# Supplementary material for: Synthesis and structural evaluation of closed-shell folded and open-shell twisted hexabenzo[5.6.7]quinarene
Source: Royal Society of Chemistry journal article supplement (doi:10.1039/d3cc02157b), 2023-01-01
Supplement: d3cc02157b1.pdf [file d3cc02157b1.pdf]

## Electronic Supplementary Information (ESI)

### **Synthesis and Structural Evaluation of Closed-Shell Folded and Open-Shell Twisted Hexabenz[5.6.7]quinarene**

Tomohiko Nishiuchi,<sup>a,b\*</sup> Kazuyuki Uchida,<sup>a</sup> and Takashi Kubo<sup>a,b\*</sup>

[a] Department of Chemistry, Graduate School of Science, Osaka University, Machikaneyama 1-1, Toyonaka, Osaka 560-0043, Japan. E-mail: [nishiuchit13@chem.sci.osaka-u.ac.jp](mailto:nishiuchit13@chem.sci.osaka-u.ac.jp), [kubo@chem.sci.osaka-u.ac.jp](mailto:kubo@chem.sci.osaka-u.ac.jp)

[b] Innovative Catalysis Science Division, Institute for Open and Transdisciplinary Research Initiatives, (ICS-OTRI), Osaka University, Suita, Osaka 565-0871, Japan.

## Contents

|                                                                                    |     |
|------------------------------------------------------------------------------------|-----|
| 1. General information                                                             | S3  |
| 2. Synthesis                                                                       | S3  |
| 3. Reference data of 9-anthryl substituted fluorenyl and dibenzosuberonyl radicals | S6  |
| 4. X-ray crystallographic data                                                     | S7  |
| 5. 2D NMR data                                                                     | S8  |
| 6. UV-vis spectra of <b>1-F</b>                                                    | S8  |
| 7. Relative energy differences of <b>1</b> conformers                              | S9  |
| 8. NICS calculations of <b>1</b> <sup>2+</sup>                                     | S9  |
| 9. Charge distribution of <b>1</b> <sup>2+</sup>                                   | S10 |
| 10. UV-vis spectra of <b>1</b> <sup>2+</sup>                                       | S10 |
| 11. Kohn-Sham molecular orbitals and TD-DFT calculations of <b>1</b> <sup>2+</sup> | S11 |
| 12. Plausible competitive equilibrium of <b>1-T</b>                                | S12 |
| 13. UV-vis spectra of <b>1-T</b> with different solvents                           | S12 |
| 14. Kohn-Sham molecular orbitals and TD-DFT calculations of <b>1-T</b>             | S13 |
| 15. Electrostatic potential surface of <b>1-T</b>                                  | S14 |
| 16. Spin density of <b>1-T</b>                                                     | S15 |
| 17. NMR spectra                                                                    | S16 |
| 18. Calculated Cartesian coordination                                              | S20 |

## General information

All experiments with moisture- or air-sensitive compounds were performed in anhydrous solvents under nitrogen atmosphere in well-dried glassware. Dried solvents (THF and dichloromethane) were purchased from KANTO CHEMICAL. Column chromatography was performed with silica gel [Silica gel 60N (KANTO CHEMICAL)].  $^1\text{H}$  and  $^{13}\text{C}$  NMR spectra were recorded on JEOL lambda-500 spectrometer or Bruker AVANCENE600 spectrometer. Positive EI mass spectra were taken by using Shimadzu QP-5050. MALDI TOF MS spectra were taken by KRATOS AXIMA-PERFORMANCE (Shimadzu). Dithranol was used for the matrix. Data collection for X-ray crystal analysis was performed on Rigaku XtaLAB Synaergy Custom (Detector is Hypix-6000HE. Mo-K $\alpha$  ( $\lambda = 0.71069 \text{ \AA}$ )). The structure was solved with direct methods and refined with full-matrix least squares. UV-vis absorption spectra were measured in anhydrous dichloromethane, DMF, and toluene with a JASCO V-570 spectrometer. Cyclic voltammetric measurement was performed with a BAS CV-50W electrochemical analyzer under the nitrogen atmosphere. Cyclic voltammograms were recorded with a grassly carbon working electrode, an Ag/AgNO $_3$  reference electrode, and a Pt counter electrode in DCM containing 0.1 M  $^n\text{Bu}_4\text{NPF}_6$  as a supporting electrolyte.

**Computational Methods.** All DFT calculations were performed with the Gaussian 16 program. Structure optimization in both ground states were performed by (U) $\omega$ B97XD/6-31G\*\*. TD-DFT calculations of **1** and **1** $^{2+}$  were performed by a (U)CAM-B3LYP/6-31G\*\* method with a tuned-parameter method ( $\mu = 0.150$ ,  $\alpha = 0.0799$ ,  $\beta = 0.9201$  [ $\alpha + \beta = 1.0$ ])<sup>[S1]</sup>, using optimized structures by (U) $\omega$ B97XD/6-31G\*\* method.

Reference:

[S1] K. Okubo, Y. Shigeta, R. Kishi, M. Nakano, *Chem. Phys. Lett.* **2013**, 585, 201.

## Synthesis

### 5-(10-Bromoanthracen-9-yl)-5H-dibenzo[*a,d*]cyclohepten-5-ol (**2**)

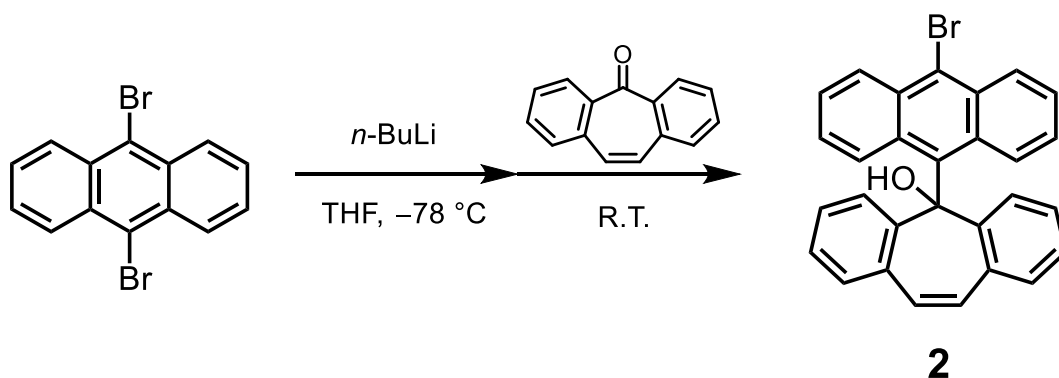

To a suspension of 9,10-dibromoanthracene (2.7 g, 7.9 mmol) in THF (70 mL) was added  $^n\text{BuLi}$  (1.6 M, 7.9 mmol) at  $-78\text{ }^\circ\text{C}$  under nitrogen atmosphere. After stirring for 1 hour, to the solution was added a solution of 5H-dibenzo[*a,d*]cyclohepten-5-one (1.5 g, 7.2 mmol) in THF (20 mL). After the reaction mixture was stirred at room temperature for 14 hours, aqueous ammonium chloride was added for quenching. The reaction mixture was extracted with ether, and the organic layer was separated and washed with brine, dried over anhydrous sodium sulfate. After filtration, the filtrate was evaporated, and the residual solid was washed with DCM/hexane to give **2** as a pale yellow solid (2.4 g, 73%). Mp  $> 115\text{ }^\circ\text{C}$  (decomp.);  $R_f = 0.47$  (DCM/hexane 50%);  $^1\text{H}$  NMR (500 MHz, Acetone- $d_6$ )  $\delta$  8.54 (dd,  $J = 8.0$  Hz, 1.0 Hz, 2H), 8.35 (ddd,  $J = 8.5$  Hz, 1.0 Hz, 0.5 Hz, 2H), 7.72 (dt,  $J = 9.0$  Hz, 0.5 Hz, 2H), 7.58 (ddd,  $J = 8.5$  Hz, 7.0 Hz, 1.0 Hz, 2H), 7.31 (ddd,  $J = 8.5$  Hz, 6.5 Hz, 1.0 Hz, 2H), 7.16 (td,  $J = 7.5$  Hz, 1.5 Hz, 2H), 6.94 (dd,  $J = 7.5$  Hz, 1.5 Hz, 2H), 6.78 (ddd,  $J = 9.0$  Hz, 6.5 Hz, 1.0 Hz, 2H), 6.71 (s, OH), 5.95 (s, 2H);  $^{13}\text{C}$  NMR (126 MHz, Acetone- $d_6$ )  $\delta$  147.59, 138.58, 132.89, 131.73, 131.15, 130.91, 128.95, 128.54, 127.69, 127.58, 126.72, 126.15, 123.68, 123.30, 122.92, 79.72; EI-MS  $m/z$  464 ( $[\text{M}+1]^+$ ), 462 ( $[\text{M}-1]^+$ ); Anal. Calcd for  $\text{C}_{29}\text{H}_{19}\text{BrO}$ : C, 75.17; H, 4.13. Found: C, 74.91; H, 4.09.

### 10-(5*H*-dibenzo[*a,d*]cyclohepten-5-ylidene)anthracen-9(10*H*)-one (3)

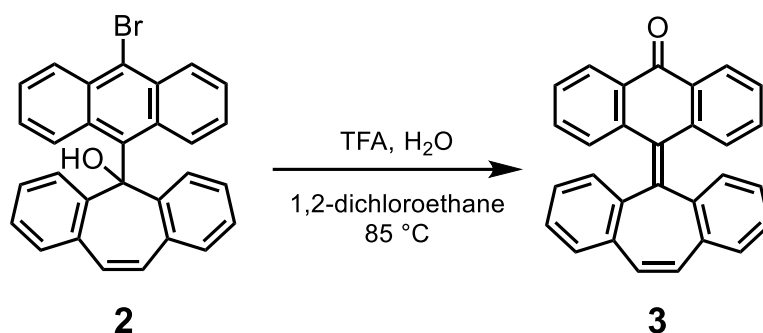

To a solution of **2** (0.60 g, 1.3 mmol) in 1,2-dichloroethane (24 mL) was added trifluoroacetic acid (6 mL) and water (6 mL), and then the reaction mixture was stirred for 48 hours at 85 °C. After the solution was cooled to room temperature, the organic layer was separated, washed with aqueous sodium carbonate, and dried over anhydrous sodium sulfate. After filtration, the filtrate was evaporated and the residue was purified by column chromatography on silica gel (DCM/hexane 50%) to give **3** as a pale yellow solid (0.45 g, 91%). Mp 282–283 °C;  $R_f$  = 0.27 (DCM/hexane 50%);  $^1\text{H}$  NMR (500 MHz, dichloromethane- $d_2$ )  $\delta$  8.06 (d,  $J$  = 8.0 Hz, 2H), 7.50 (d,  $J$  = 7.5 Hz, 2H), 7.32–7.27 (m, 6H), 7.12 (t,  $J$  = 8.0 Hz, 2H), 7.02 (t,  $J$  = 8.0 Hz, 2H), 6.81 (d,  $J$  = 7.5 Hz, 2H), 6.55 (d,  $J$  = 8.0 Hz, 2H);  $^{13}\text{C}$  NMR (126 MHz,  $\text{CDCl}_3$ )  $\delta$  186.14, 142.12, 138.95, 138.46, 134.95, 133.44, 131.25, 130.09, 129.33, 129.24, 128.84, 128.03, 127.97, 127.14, 127.11, 126.24; EI-MS  $m/z$  382 ( $[\text{M}]^+$ ); Anal. Calcd for  $\text{C}_{29}\text{H}_{18}\text{O}$ : C, 91.07; H, 4.74. Found: C, 91.07; H, 4.72.

### 5-(10-(9*H*-fluoren-9-ylidene)anthracen-9(10*H*)-ylidene)-5*H*-dibenzo[*a,d*]heptene (1)

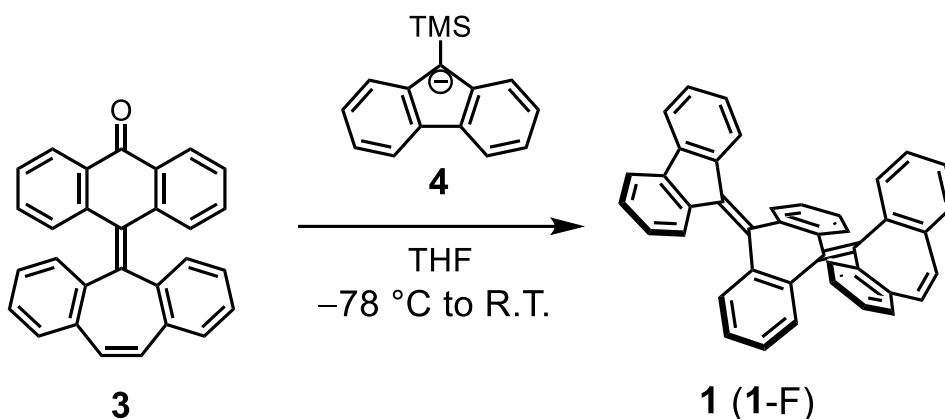

To a solution of (9*H*-fluoren-9-yl)trimethylsilane (0.23 g, 0.95 mmol) in THF (10 mL) was added  $n\text{BuLi}$  (1.6 M, 0.95 mmol) at  $-78$  °C under nitrogen atmosphere, and the solution was stirred for 1 hour. To the solution was added **3** (0.31 g, 0.81 mmol) in THF (10 mL), and then the reaction mixture was stirred at room temperature. After 18 hours stirring, aqueous ammonium chloride was added for quenching. The reaction mixture was extracted with DCM, and the organic layer was separated, washed with brine, dried over sodium sulfate. After filtration, the filtrate was evaporated and the residue was purified by column chromatography on silica gel (DCM/hexane 10%) to give **1 (1-F)** as a pale yellow solid (0.32 g, 74%). Mp > 300 °C;  $R_f$  = 0.27 (DCM/hexane 20%);  $^1\text{H}$  NMR (600 MHz, dichloromethane- $d_2$ )  $\delta$  7.87 (d,  $J$  = 8.4 Hz, 2H), 7.82 (dd,  $J$  = 7.2 Hz, 0.6 Hz, 2H), 7.78 (d,  $J$  = 7.2 Hz, 2H), 7.45 (dd,  $J$  = 7.8 Hz, 1.2 Hz, 2H), 7.36 (td,  $J$  = 7.2 Hz, 1.2 Hz, 2H), 7.28 (td,  $J$  = 7.2 Hz, 1.2 Hz, 2H), 7.20 (s, 2H), 7.14–7.09 (m, 6H), 6.98 (dd,  $J$  = 7.8 Hz, 1.2 Hz, 2H), 6.91 (td,  $J$  = 7.2 Hz, 1.2 Hz, 2H), 6.58 (dd,  $J$  = 7.8 Hz, 0.6 Hz, 2H);  $^{13}\text{C}$  NMR (126 MHz, dichloromethane- $d_2$ )  $\delta$  140.48, 138.95, 138.43, 138.35, 138.31, 138.22, 137.01, 135.09, 135.06, 130.98, 130.06, 129.16, 128.21, 128.11, 127.84, 127.75, 127.13, 126.71, 126.07, 125.93, 124.92, 124.71, 119.10; EI-MS  $m/z$  530 ( $[\text{M}]^+$ ); Anal. Calcd for  $\text{C}_{42}\text{H}_{26}$ : C, 95.06; H, 4.94. Found: C, 95.11; H, 5.01.

**Dication salt of 5-(10-(9*H*-fluoren-9-ylidene)anthracen-9(10*H*)-ylidene)-5*H*-dibenzo[*a,d*]heptene ( $1^{2+}$ )**

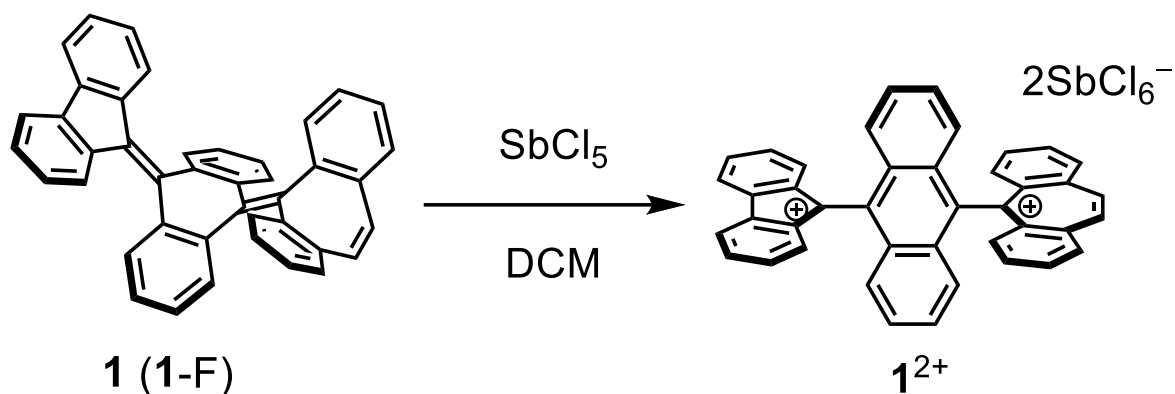

To a solution of **1** (53 mg, 0.094 mmol) in DCM (10 mL) was added antimony(V) chloride (1.0 M, 0.37 mmol) at 0 °C under nitrogen atmosphere. After the reaction mixture was stirred for 30 min., hexane (10 mL) was added. The precipitate of **1<sup>2+</sup>** salt that appeared after the addition of hexane was collected and washed with hexane. The crude product was purified by the reprecipitation from DCM/hexane to give **1<sup>2+</sup>·2SbCl<sub>6</sub><sup>-</sup>** as a dark red solid (115 mg, 96%). <sup>1</sup>H NMR (500 MHz, dichloromethane-*d*<sub>2</sub>)  $\delta$  9.54 (s, 2H), 8.97 (d, *J* = 8.5 Hz, 2H), 8.82 (d, *J* = 9.0 Hz, 2H), 8.67 (t, *J* = 7.5 Hz, 2H), 8.18 (t, *J* = 7.5 Hz, 2H), 8.05 (d, *J* = 9.0 Hz, 2H), 7.84 (t, *J* = 8.5 Hz, 2H), 7.50 (t, *J* = 7.5 Hz, 2H), 7.42 (d, *J* = 7.5 Hz, 2H), 7.38 (t, *J* = 7.5 Hz, 2H), 7.03 (d, *J* = 7.0 Hz, 2H), 6.93 (d, *J* = 8.5 Hz, 2H), 6.87 (t, *J* = 7.5 Hz, 2H); Anal. Calcd for C<sub>42</sub>H<sub>26</sub>Cl<sub>12</sub>Sb<sub>2</sub>: C, 42.05; H, 2.18. Found: C, 41.91; H, 2.33.

**Diradical of 5-(10-(9*H*-fluoren-9-ylidene)anthracen-9(10*H*)-ylidene)-5*H*-dibenzo[*a,d*]heptene (1-T)**

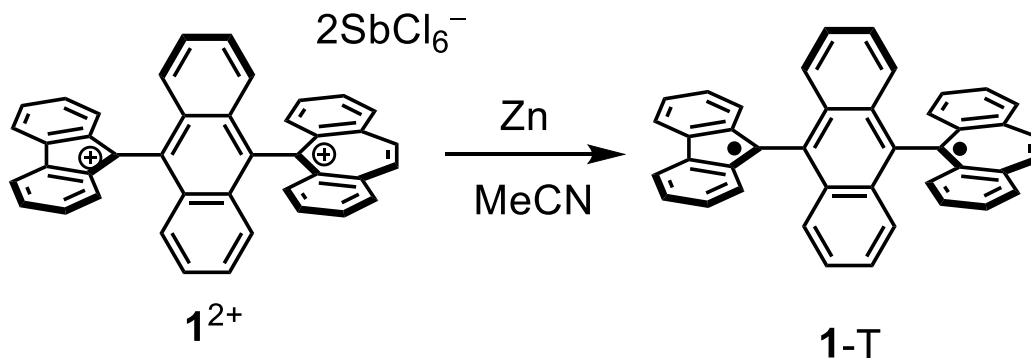

To a solution of **1<sup>2+</sup>** (13 mg, 0.010 mmol) in MeCN (3 mL) was added zinc powder (13 mg 0.20 mmol) at -40 °C under nitrogen atmosphere. After the reaction mixture was stirred for 1 hour, brown to black precipitate was collected by filtration. After dried the precipitate under vacuum, this precipitate (2~3 mg) was used for the measurement of ESR and UV-vis spectra.

## Reference data of 9-anthryl substituted fluorenyl and dibenzosuberonyl radicals

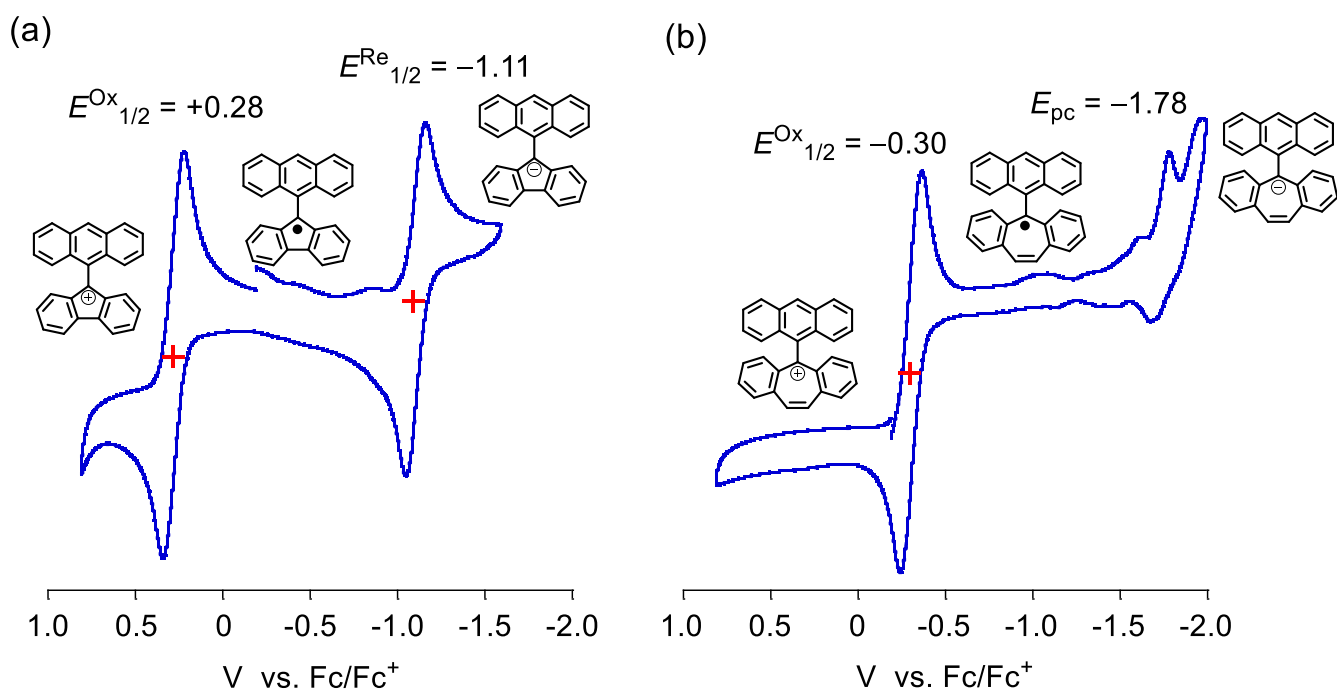

**Figure S1.** (a) Cyclic voltammogram of 9-anthryl substituted fluorenyl radical. (b) Cyclic voltammogram of 9-anthryl substituted dibenzosuberonyl radical. Due to high reactivity of  $8\pi$ -electron antiaromatic system in the seven-membered ring of dibenzosuberonyl anion, irreversible wave was observed at  $E_{\text{pc}} = -1.78$  V. Measurement condition: 0.1 m  $n\text{Bu}_4\text{PF}_6$  in  $\text{CH}_2\text{Cl}_2$ , scan rate =  $100 \text{ mV s}^{-1}$ , room temperature.

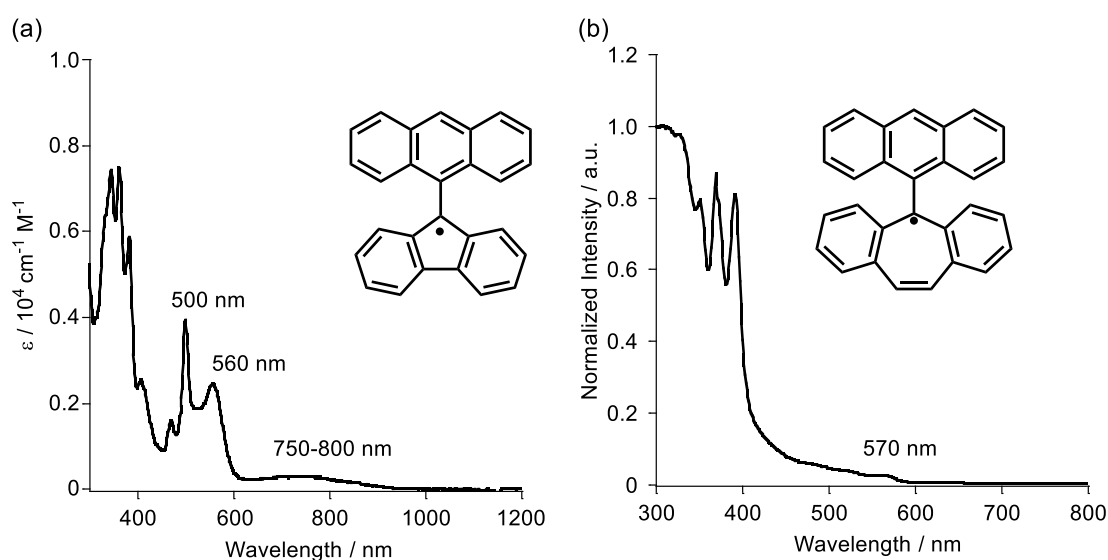

**Figure S2.** (a) UV-vis spectrum of 9-anthryl substituted fluorenyl radical in  $\text{CH}_2\text{Cl}_2$ . (b) UV-vis spectrum of 9-anthryl substituted dibenzosuberonyl radical in  $\text{CH}_2\text{Cl}_2$ .

## X-ray crystallographic data

**Crystal data for 1-F.** CCDC 2256324.  $C_{42}H_{26}$ ,  $M_w = 530.63$  g/mol, monoclinic, space group  $C2/c$  (no. 15),  $a = 26.2349(11)$  Å,  $b = 10.4272(3)$  Å,  $c = 24.3603(10)$  Å,  $\beta = 123.766(6)^\circ$ ,  $V = 5539.8(5)$  Å<sup>3</sup>,  $Z = 8$ ,  $T = 120.15$  K,  $\mu(\text{Mo K}\alpha) = 0.072$  mm<sup>-1</sup>,  $D_{\text{calc}} = 1.272$  g/cm<sup>3</sup>, 45228 reflections measured ( $3.664^\circ \leq 2\theta \leq 61.528^\circ$ ), 7363 unique ( $R_{\text{int}} = 0.0561$ ,  $R_{\text{sigma}} = 0.0450$ ) which were used in all calculations. The final  $R_1$  was 0.0456 ( $I > 2\sigma(I)$ ) and  $wR_2$  was 0.1080 (all data),  $GOF = 1.061$ .

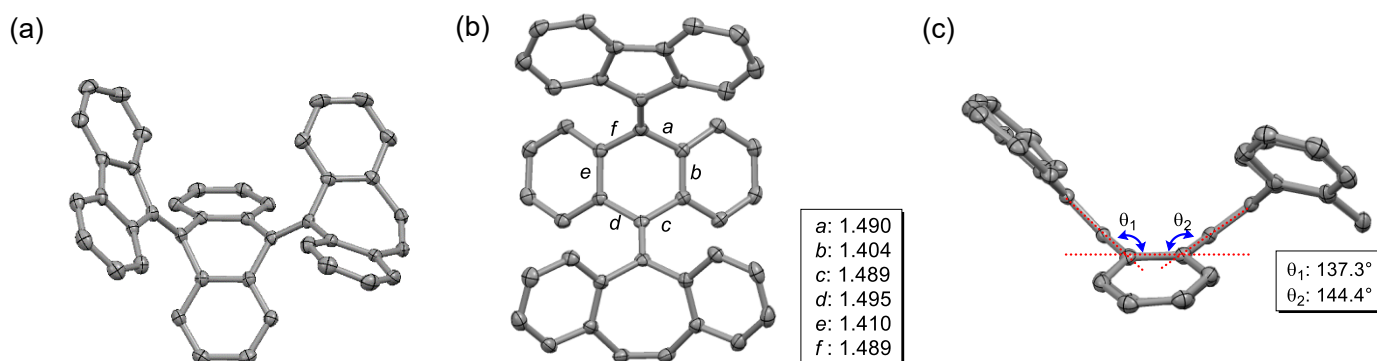

**Figure S3.** X-ray crystal structure of **1-F**. (a) Side view 1, (b) top view with C-C bond length (Å) of the central anthracene core., and (c) side view 2 with bent angles  $\theta_1$  and  $\theta_2$  of the central anthraquinodimethane core. Protons are omitted for clarity.

**Crystal data for 1<sup>2+</sup>.** CCDC 2256323.  $C_{43}H_{28}Cl_{14}Sb_2$ ,  $M_w = 1284.45$  g/mol, monoclinic, space group  $P2_1/n$  (no. 14),  $a = 10.6573(2)$  Å,  $b = 34.0386(6)$  Å,  $c = 14.0166(2)$  Å,  $\beta = 97.905(2)^\circ$ ,  $V = 5036.34(15)$  Å<sup>3</sup>,  $Z = 4$ ,  $T = 120.15$  K,  $\mu(\text{Mo K}\alpha) = 1.846$  mm<sup>-1</sup>,  $D_{\text{calc}} = 1.694$  g/cm<sup>3</sup>, 111156 reflections measured ( $3.786^\circ \leq 2\theta \leq 61.47^\circ$ ), 13835 unique ( $R_{\text{int}} = 0.0750$ ,  $R_{\text{sigma}} = 0.0536$ ) which were used in all calculations. The final  $R_1$  was 0.0456 ( $I > 2\sigma(I)$ ) and  $wR_2$  was 0.1177 (all data),  $GOF = 1.042$ .

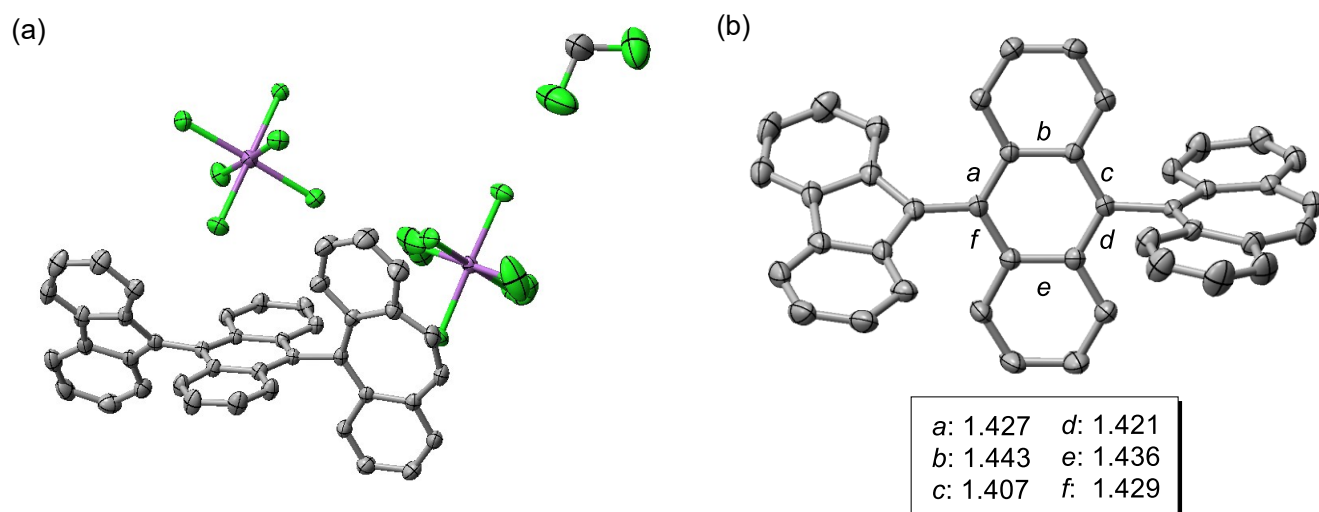

**Figure S4.** X-ray crystal structure of **1<sup>2+</sup>**. (a) Whole structure of **1<sup>2+</sup>** with counter anions of  $SbCl_6^-$  and dichloromethane. (b) Bond length (Å) of the central anthracene core. Protons are omitted for clarity.

## 2D NMR data

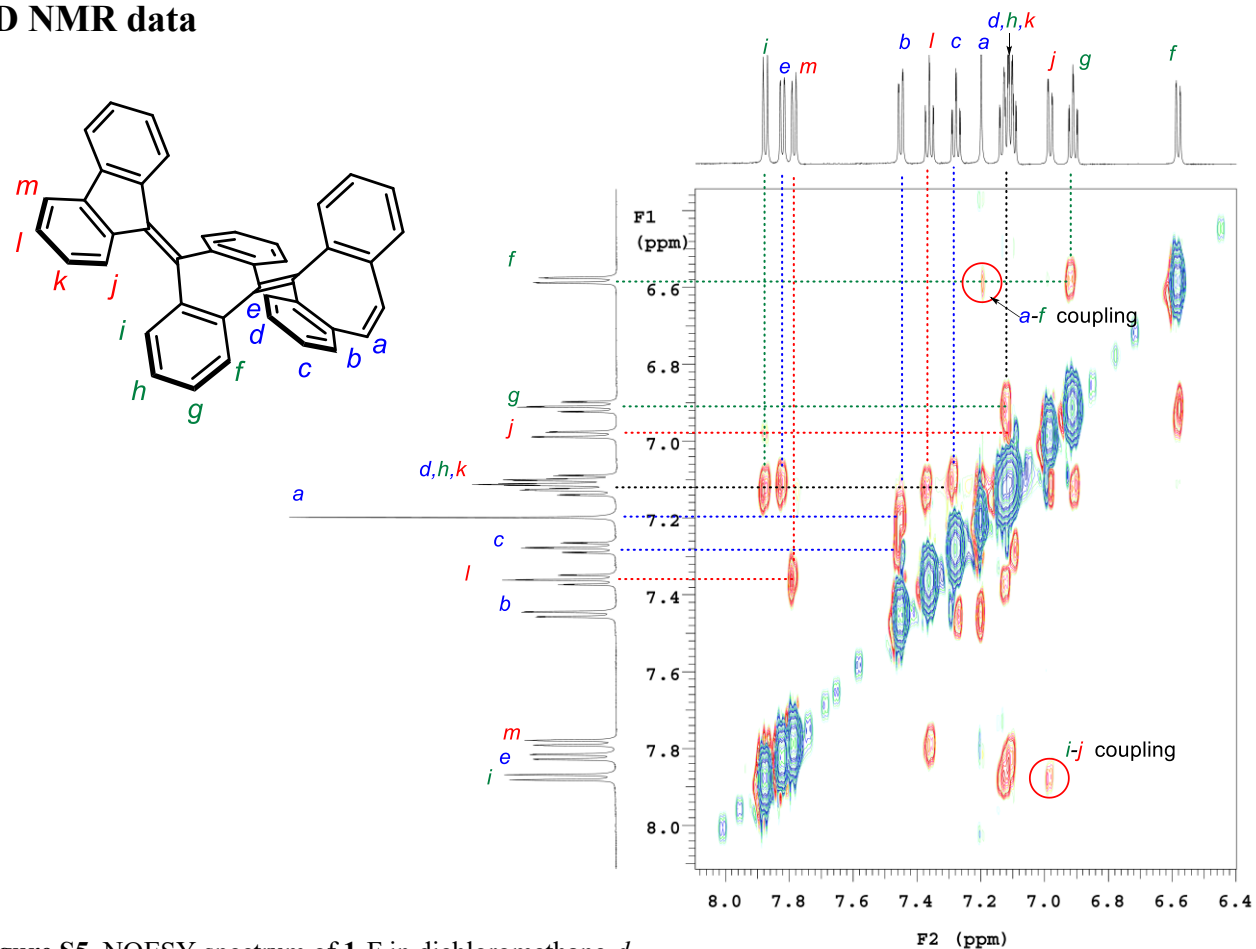

Figure S5. NOESY spectrum of 1-F in dichloromethane- $d_2$ .

## UV-vis spectra of 1-F

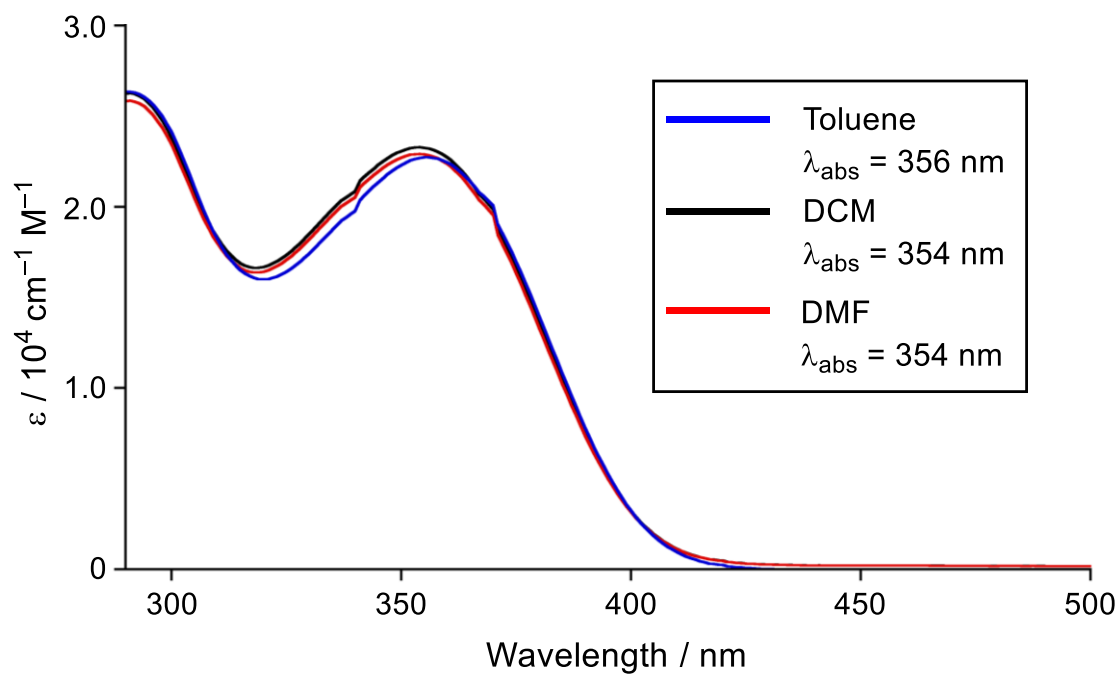

Figure S6. UV-vis spectra of 1-F in toluene (blue line), DCM (black line), and DMF (red line).



## Relative energy differences of **1** conformers

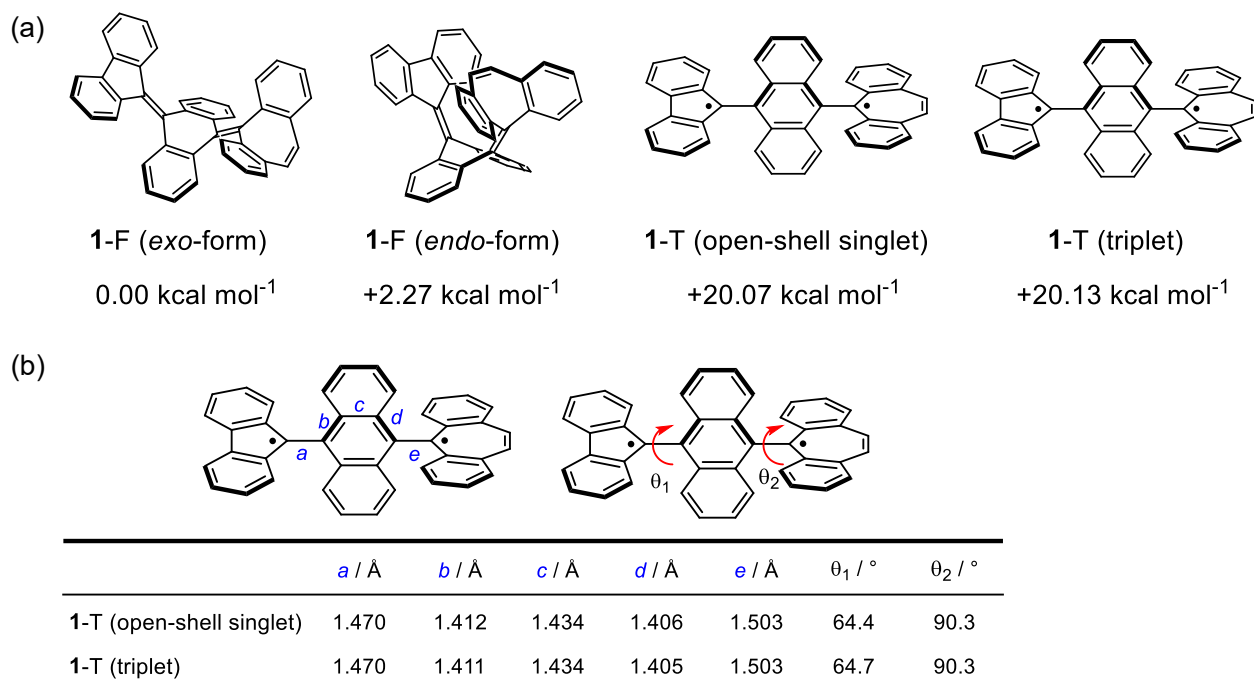

**Figure S7.** (a) Energy differences of **1-F** (*exo*-form), **1-F** (*endo*-form), **1-T** (open-shell singlet), and **1-T** (triplet). (b) Bond length and twist angles of **1-T** (open-shell singlet and triplet). ((U) $\omega$ B97X-D/6-31G\*\*).

## NICS calculations of **1**<sup>2+</sup>

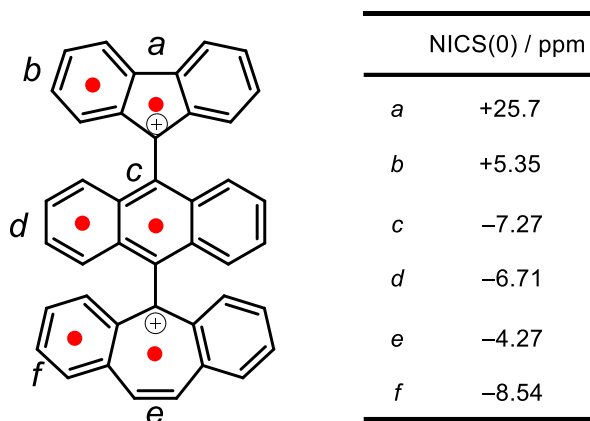

**Figure S8.** (a) NICS(0) values of **1**<sup>2+</sup> at each aromatic rings (*a* to *f*). (CAM-B3LYP-D3/6-311+G\*\*// $\omega$ B97X-D/6-31G\*\*)

## Charge distribution of $1^{2+}$

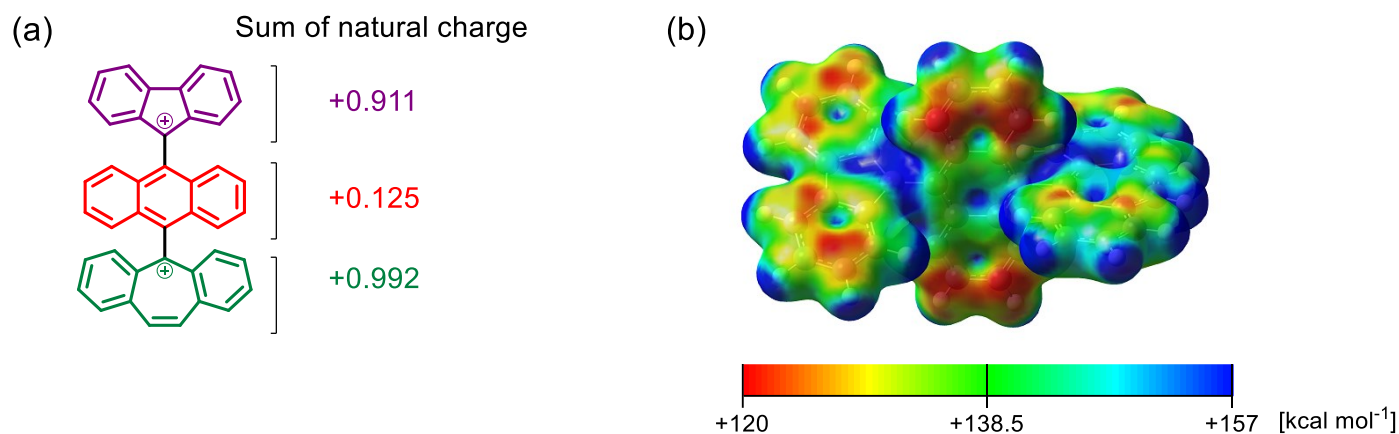

**Figure S9.** (a) Charge distribution on fluorenyl, anthryl, and dibenzosuberonyl units of  $1^{2+}$  calculated using natural population analysis. The dibenzosuberonyl cation unit has a positive charge of +0.992 and the fluorenyl cation unit has a lesser positive charge of +0.911. The residual positive charge localizes in the central anthryl unit (+0.125). (b) Electrostatic potential surface of  $1^{2+}$  shows positive  $\pi$ -surface (The color bar of energy ranges from +120 (red) to +157 (blue) kcal mol<sup>-1</sup>). ( $\omega$ B97X-D/6-311+G\*\*// $\omega$ B97X-D/6-31G\*\*).

## UV-vis spectra of $1^{2+}$

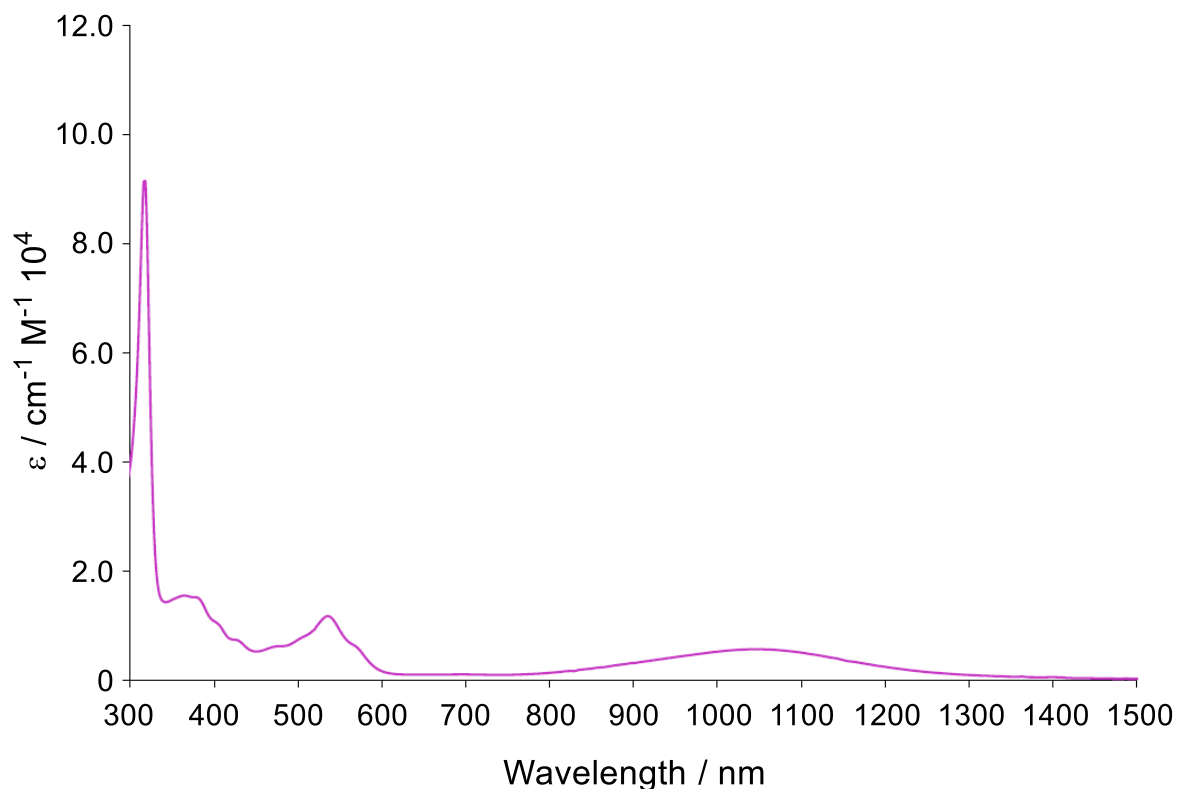

**Figure S10.** UV-vis spectra of  $1^{2+} \cdot 2SbCl_6^-$  in DCM.

## Kohn-Sham molecular orbitals and TD-DFT calculations of $1^{2+}$

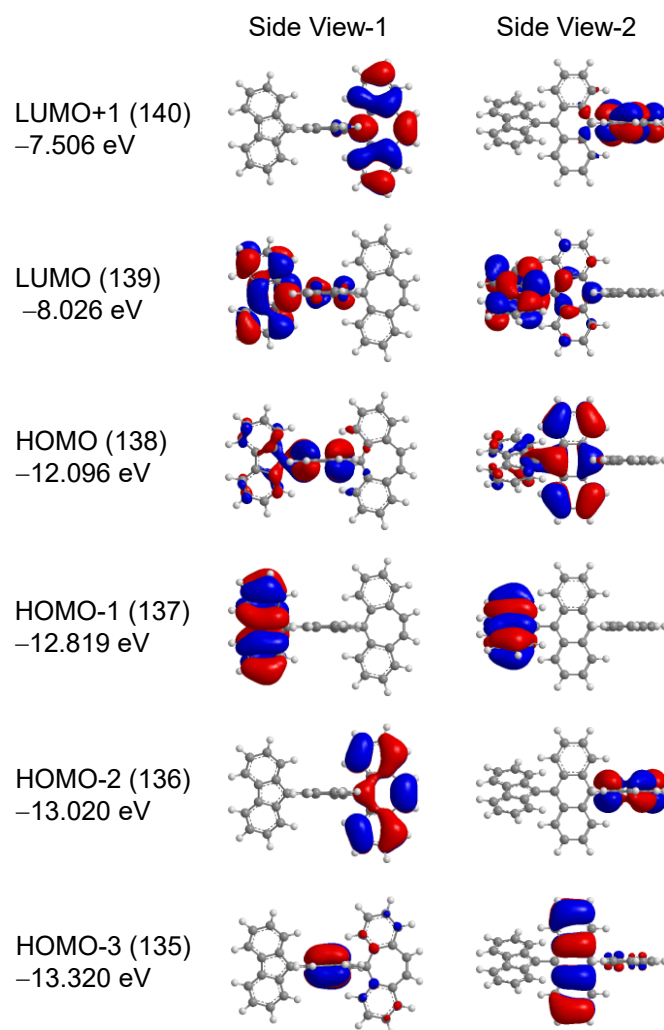

**Figure S11.** Kohn-Sham molecular orbitals and its energy of  $1^{2+}$  (CAM-B3LYP/6-31G\*\*// $\omega$ B97X-D/6-31G\*\*).

**Table S1.** TD-DFT calculation result (nstate=5) of  $1^{2+}$  (CAM-B3LYP/6-31G\*\*// $\omega$ B97X-D/6-31G\*\*).

|                  |               |           |           |            |
|------------------|---------------|-----------|-----------|------------|
| Excited State 1: | Singlet-A     | 1.3817 eV | 897.35 nm | $f=0.1502$ |
| 138 ->139        | 0.70393 (99%) |           |           |            |
| Excited State 2: | Singlet-A     | 1.4390 eV | 861.61 nm | $f=0.0021$ |
| 137 ->139        | 0.70267 (99%) |           |           |            |
| Excited State 3: | Singlet-A     | 1.8685 eV | 663.53 nm | $f=0.0002$ |
| 138 ->140        | 0.69947 (98%) |           |           |            |
| Excited State 4: | Singlet-A     | 2.4885 eV | 498.24 nm | $f=0.0151$ |
| 133 ->139        | 0.10314 (2%)  |           |           |            |
| 134 ->139        | 0.15759 (5%)  |           |           |            |
| 135 ->139        | 0.67523 (91%) |           |           |            |
| Excited State 5: | Singlet-A     | 2.5158 eV | 492.83 nm | $f=0.0644$ |
| 136 ->140        | 0.69850 (98%) |           |           |            |

## Plausible competitive equilibrium of 1-T

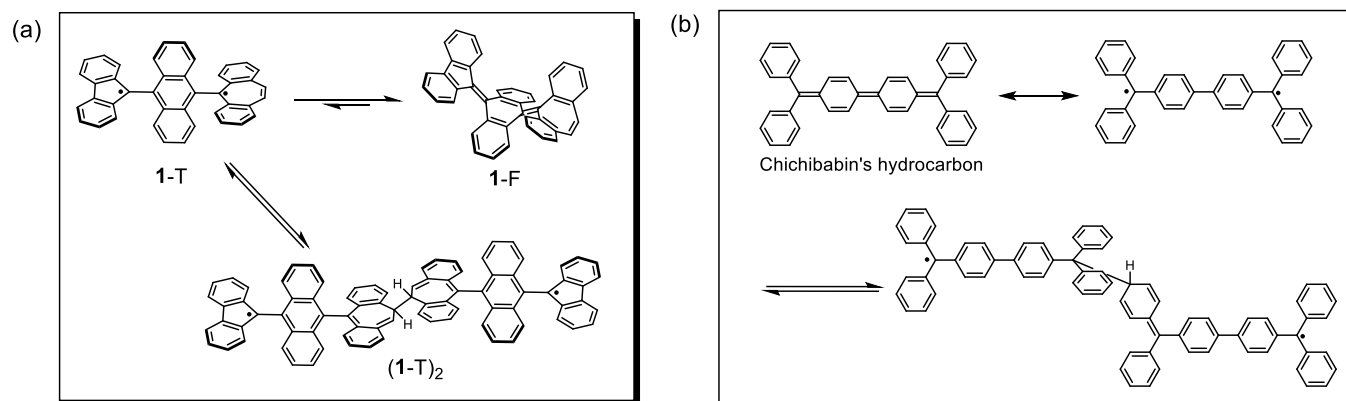

**Scheme S1.** (a) Plausible competitive equilibria of intramolecular isomerization of **1-T** to **1-F** and intermolecular dimerization of **1-T** to **(1-T)<sub>2</sub>**. (b) Typical example of the intermolecular dimerization of biradicaloid observed in Chichibabin's hydrocarbon.

## UV-vis spectra of 1-T with different solvents

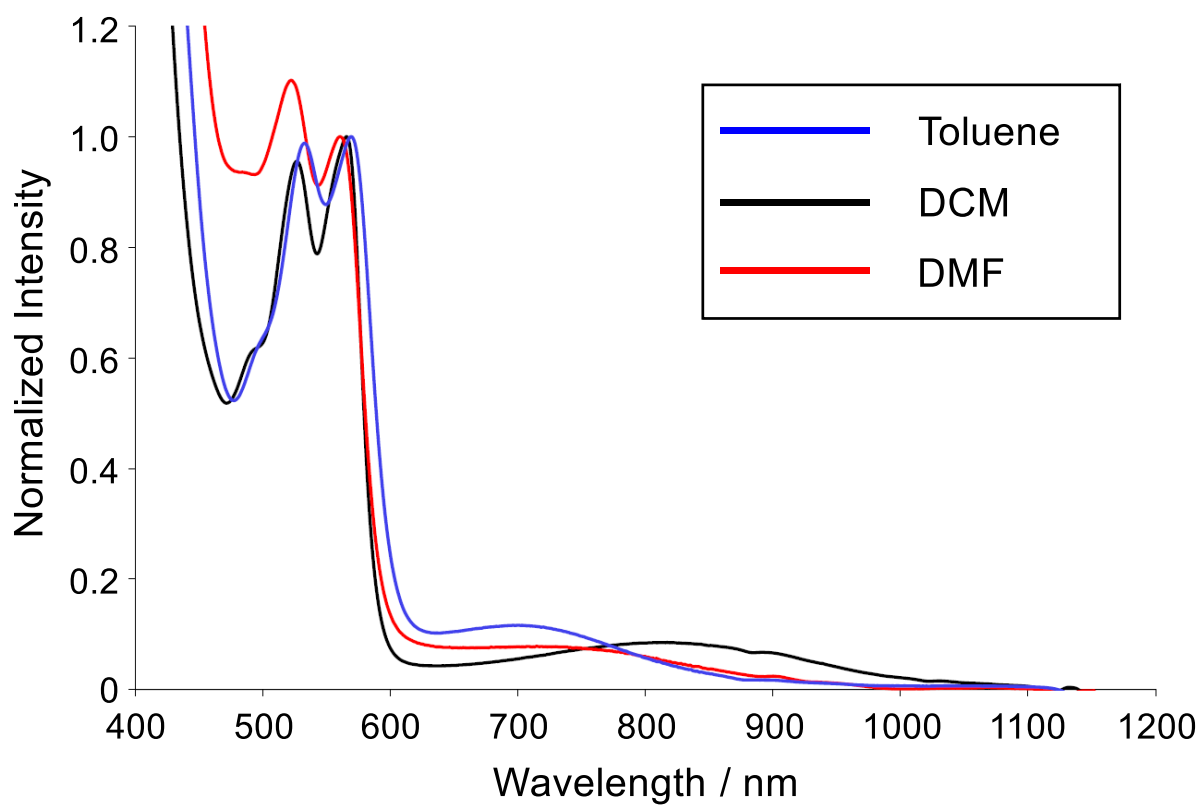

**Figure S12.** UV-vis spectra of **1-T** in toluene (blue line), DCM (black line), and DMF (red line).

## Kohn-Sham molecular orbitals and TD-DFT calculations of 1-T

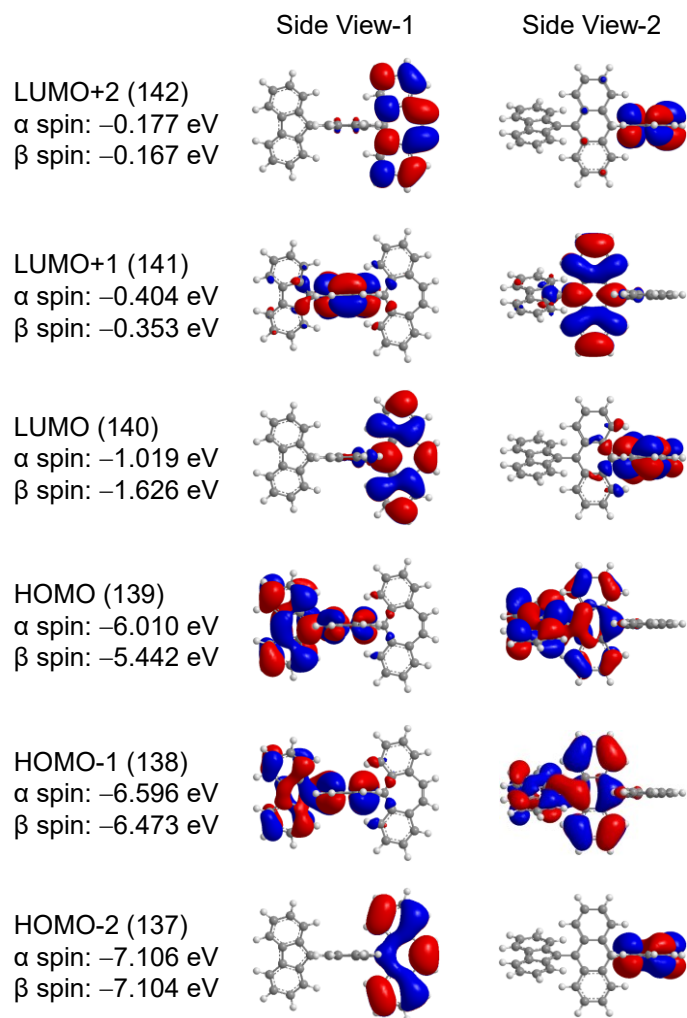

**Figure S13.** Kohn-Sham molecular orbitals and its energy of 1-T (UCAM-B3LYP/6-31G\*\*//U $\omega$ B97X-D/6-31G\*\*).

**Table S2.** TD-DFT calculation result (nstate=5) of 1-T (CAM-B3LYP/6-31G\*\*// $\omega$ B97X-D/6-31G\*\*).

|                  |             |           |           |          |              |
|------------------|-------------|-----------|-----------|----------|--------------|
| Excited State 1: | 2.402-A     | 1.6221 eV | 764.34 nm | f=0.0005 | <S**2>=1.193 |
|                  | 137A ->142A | -0.12683  | (2%)      |          |              |
|                  | 136B ->142B | -0.10570  | (1%)      |          |              |
|                  | 139B ->142B | 0.97491   | (95%)     |          |              |
| Excited State 2: | 2.976-A     | 1.7063 eV | 726.61 nm | f=0.0123 | <S**2>=1.964 |
|                  | 138A ->141A | 0.35873   | (13%)     |          |              |
|                  | 139A ->141A | 0.36772   | (14%)     |          |              |
|                  | 138B ->140B | 0.73371   | (54%)     |          |              |
|                  | 138B ->141B | -0.40542  | (16%)     |          |              |
| Excited State 3: | 1.569-A     | 1.7402 eV | 712.48 nm | f=0.0001 | <S**2>=0.366 |
|                  | 139B ->140B | 0.88326   | (78%)     |          |              |
|                  | 139B ->141B | -0.43372  | (19%)     |          |              |
| Excited State 4: | 2.329-A     | 1.8181 eV | 681.95 nm | f=0.0007 | <S**2>=1.106 |
|                  | 137B ->140B | 0.97751   | (96%)     |          |              |
|                  | 137B ->141B | 0.10859   | (1%)      |          |              |
| Excited State 5: | 2.927-A     | 2.0980 eV | 590.97 nm | f=0.0473 | <S**2>=1.892 |
|                  | 138A ->141A | -0.38030  | (14%)     |          |              |
|                  | 139A ->141A | -0.38996  | (15%)     |          |              |
|                  | 138B ->140B | 0.65581   | (43%)     |          |              |
|                  | 138B ->141B | 0.48818   | (24%)     |          |              |

## Electrostatic potential surface of 1-T

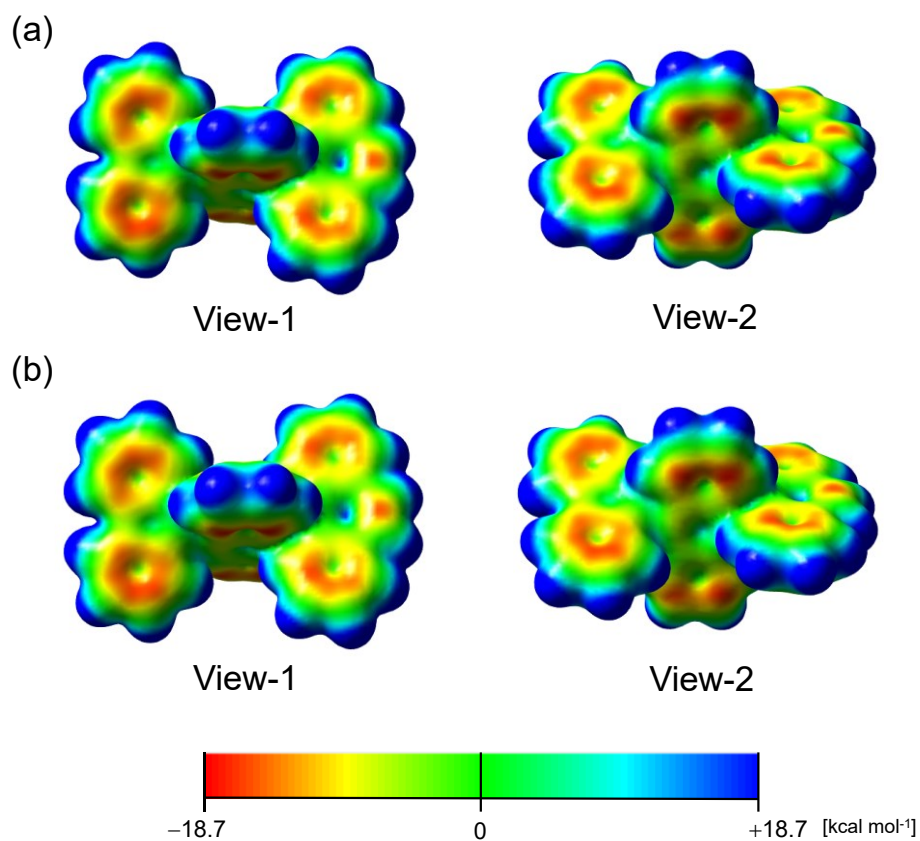

**Figure S14.** (a) Electrostatic potential surface of **1-T** (open-shell singlet, biradical character  $y_0 = 99\%$ ). (b) Electrostatic potential surface of **1-T** (triplet). The color bar of energy ranges from  $-18.7$  (red) to  $+18.7$  (blue) kcal mol<sup>-1</sup>. Computations were performed using U $\omega$ B97X-D/6-31G\*\* level of theory.

## Spin density of 1-T

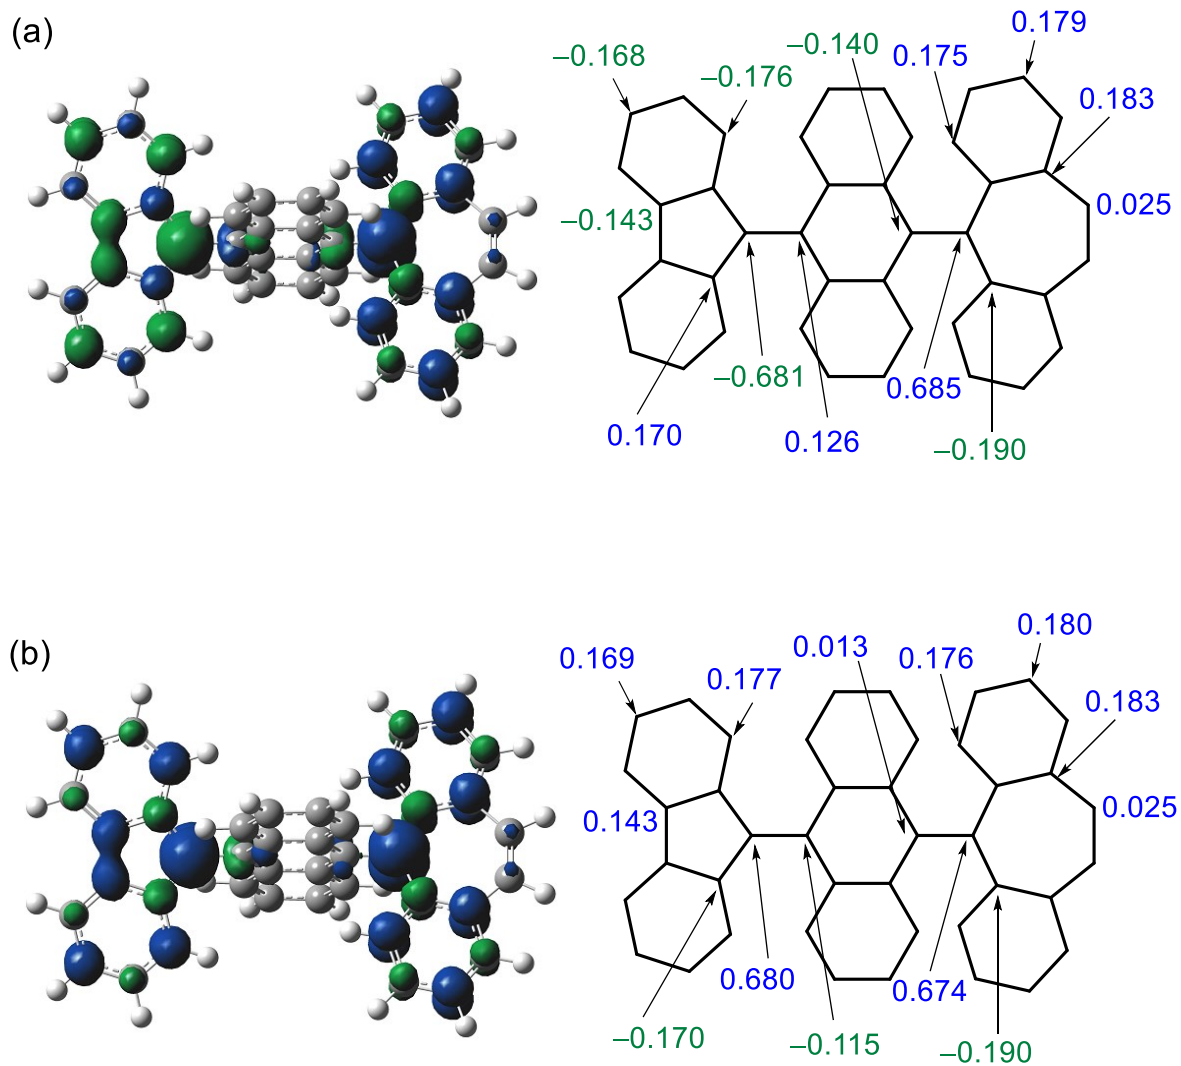

**Figure S15.** (a) Spin density map of 1-T (open-shell singlet) (left) and its values on significant positions (right). (b) Spin density map of 1-T (triplet) (left) and its values on significant positions (right). (U $\omega$ B97X-D/6-31G\*\*).

# NMR Chart

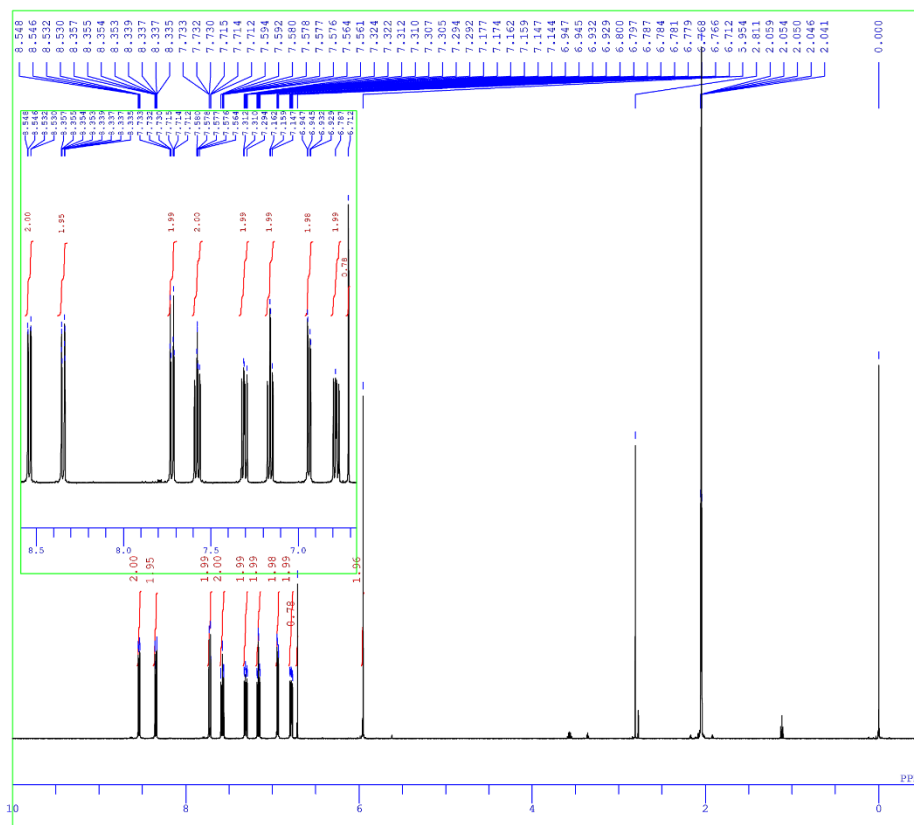

```

DEFILE 67-BrOH 1H(500MHz) Acetone.als
COMMT single pulse
DATIM 2016-03-16 16:12:34
OBNUC 1H
EXMOD proton.jxp
OBERQ 500.16 MHz
OBSET 2.41 KHz
OBFIN 6.01 Hz
POINT 52428
FREQU 7507.51 Hz
SCN5 8
ACQTM 6.9835 sec
PD 5.0000 sec
PWI 5.25 usec
FNUC 1H
CTEMP 25.0 c
SLVNT ACETN
EXREF 0.00 ppm
BF 0.10 Hz
RGAIN 46
    
```

Figure S16. <sup>1</sup>H NMR (500 MHz) of compound 2 (Acetone-*d*<sub>6</sub>).

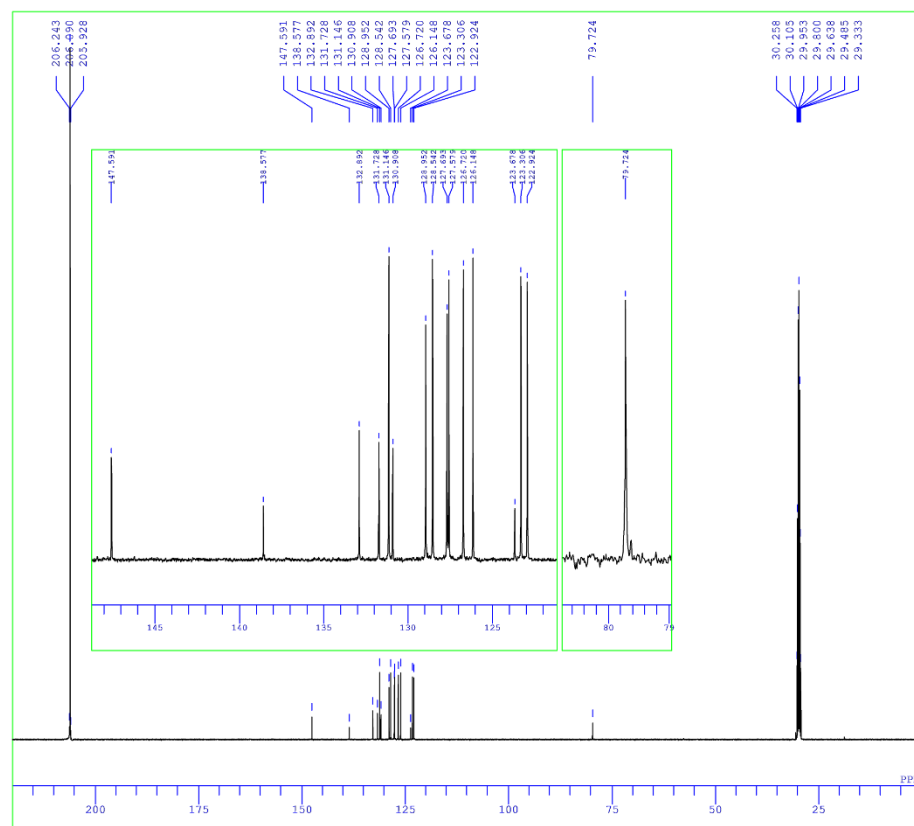

```

DEFILE 67-BrOH 13C(126MHz) Acetone.als
COMMT single pulse decoupled gated NOE
DATIM 2016-03-17 17:15:51
OBNUC 13C
EXMOD carbon.jxp
OBERQ 125.77 MHz
OBSET 7.87 KHz
OBFIN 4.21 Hz
POINT 26214
FREQU 31446.54 Hz
SCN5 2134
ACQTM 0.8336 sec
PD 2.0000 sec
PWI 4.33 usec
FNUC 13C
CTEMP 25.0 c
SLVNT ACETN
EXREF 29.80 ppm
BF 1.50 Hz
RGAIN 56
    
```

Figure S17. <sup>13</sup>C NMR (126 MHz) of compound 2 (Acetone-*d*<sub>6</sub>).



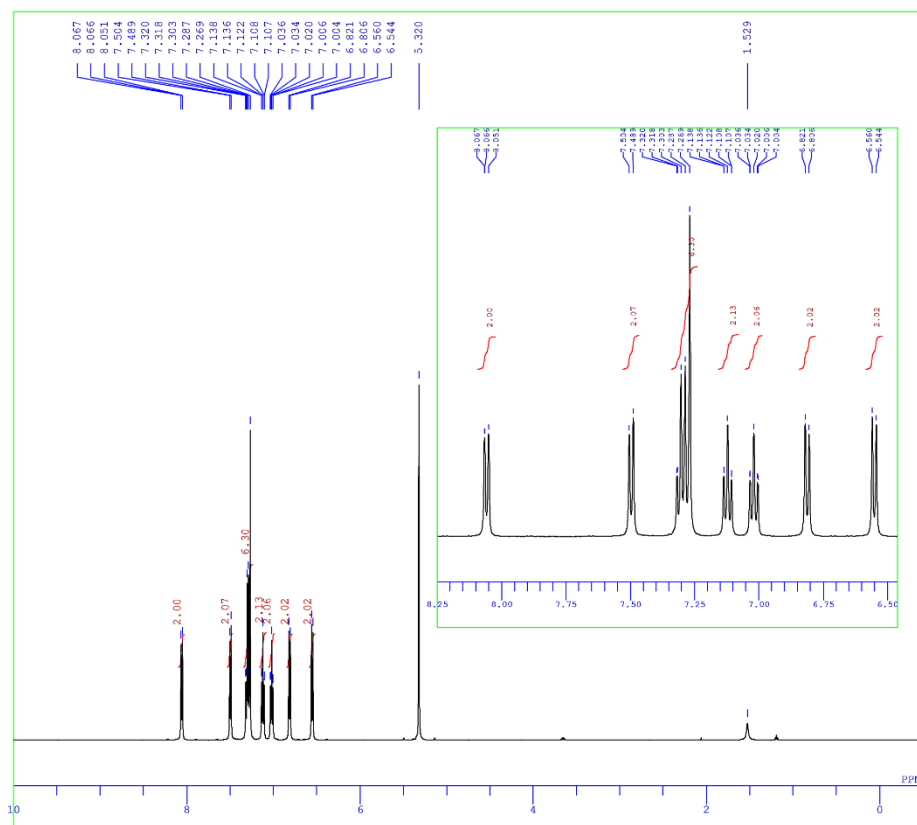

```

DPFILE 67-C-O 1H(500MHz)_CD2Cl2.als
COMMENT single_pulse
DATIM 2016-03-25 17:09:42
ORNUC 1H
EXMOD proton.jxp
OBFRQ 500.16 MHz
OBSET 2.41 KHz
OBFIN 6.01 Hz
POINT 52428
FREQU 7507.51 Hz
SCANS 8
ACQTM 6.9835 sec
PD 5.0000 sec
PWI 5.25 usec
IRNUC 1H
CTEMP 25.0 c
SLVNT CD2CL2
EXREF 5.32 ppm
BF 1.50 Hz
RGAIN 50

```

Figure S18.  $^1\text{H}$  NMR (500 MHz) of compound 3 ( $\text{CD}_2\text{Cl}_2$ ).

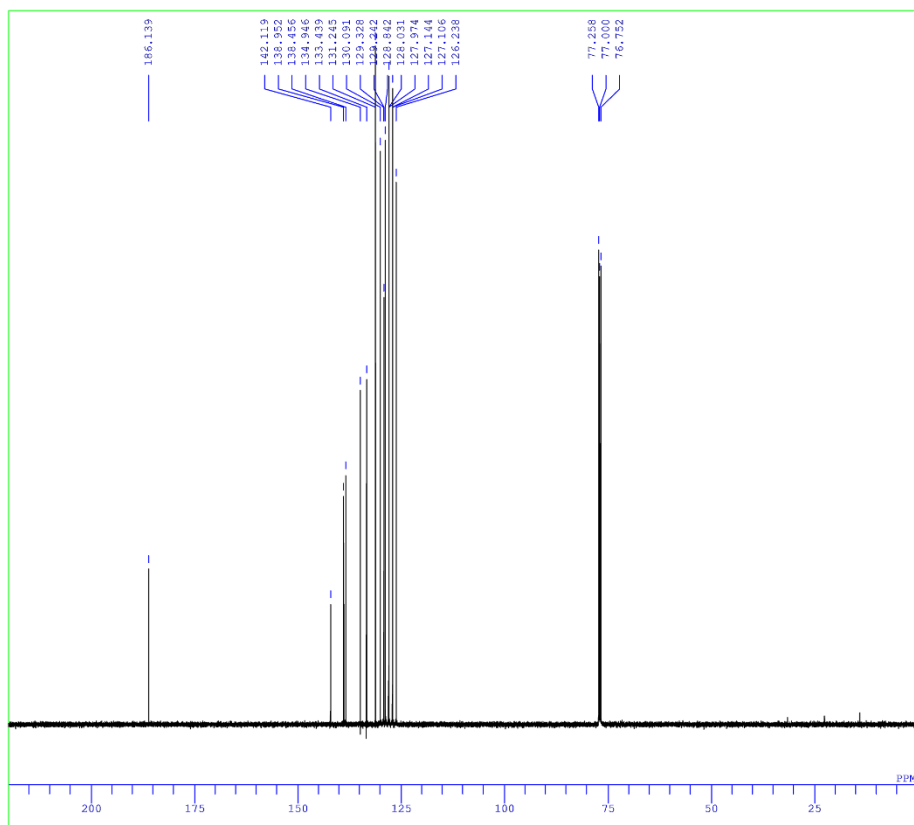

```

DPFILE 67-C-O 13C(126MHz)_CDCl3.als
COMMENT single pulse decoupled gated NOE
DATIM 2016-03-03 19:14:22
ORNUC 13C
EXMOD carbon.jxp
OBFRQ 125.77 MHz
OBSET 7.87 KHz
OBFIN 4.21 Hz
POINT 26214
FREQU 31446.54 Hz
SCANS 2202
ACQTM 0.8336 sec
PD 2.0000 sec
PWI 4.33 usec
IRNUC 1H
CTEMP 25.0 c
SLVNT CDCL3
EXREF 77.00 ppm
BF 0.12 Hz
RGAIN 58

```

Figure S19.  $^{13}\text{C}$  NMR (126 MHz) of compound 3 ( $\text{CDCl}_3$ ).



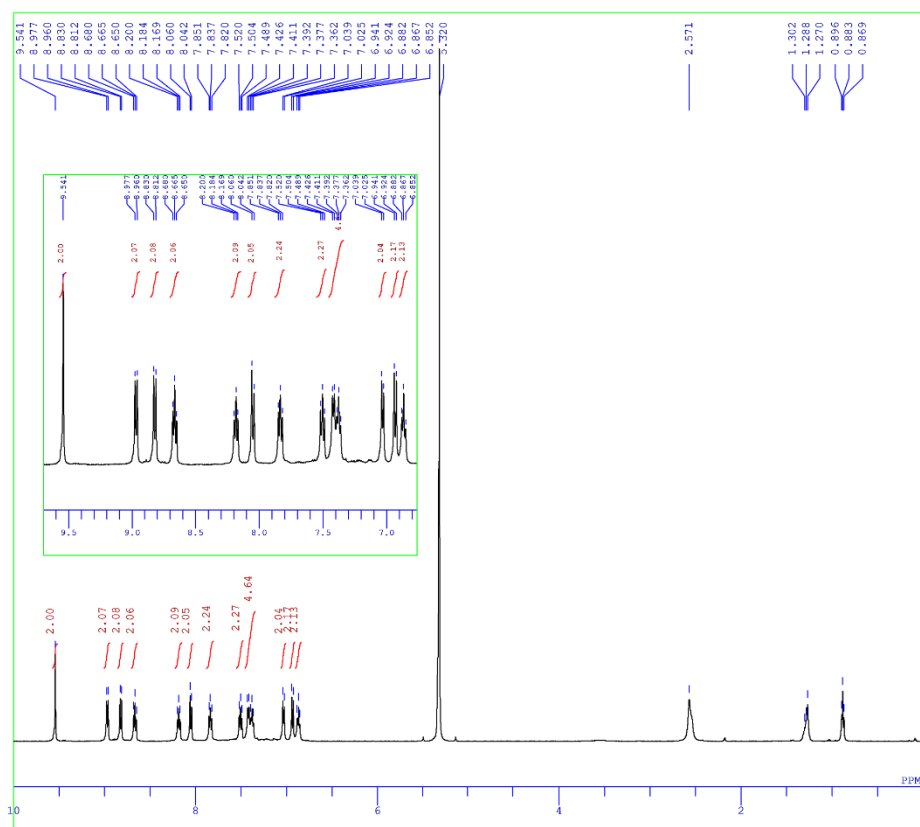

```

DPF11: 567(2+) 1H(500MHz)_DCM.wis
COM1: single pulsed
DATIM: 2016-02-25 17:25:48
ORNUC: 1H
EXMID: proton.jxp
OBERQ: 500.16 Mhz
OBSET: 2.41 KHz
OBFM: 6.01 Hz
POINT: 52428
FREQU: 7507.51 Hz
SCANS: 64
ACQTM: 6.9835 sec
PD: 5.0000 sec
PWI: 5.25 usec
FRNUC: 1H
CTEMP: 25.0 c
SLVNT: CD2Cl2
EXREF: 5.32 ppm
BE: 1.50 Hz
RGAIN: 50

```

Figure S22.  $^1\text{H}$  NMR (500 MHz) of compound  $1^{2+} \cdot 2\text{SbCl}_6^- (\text{CD}_2\text{Cl}_2)$ .

## Calculated Cartesian coordination

**Table S3.** Cartesian Coordinates of 1-F (*exo* form) (C<sub>42</sub>H<sub>26</sub>, total 68 atoms) ( $\omega$ B97X-D/6-31G\*\*).

| Center Number | Atomic Number | Atomic Type | Coordinates (Angstroms) |           |           | Center Number | Atomic Number | Atomic Type | Coordinates (Angstroms) |           |           |
|---------------|---------------|-------------|-------------------------|-----------|-----------|---------------|---------------|-------------|-------------------------|-----------|-----------|
|               |               |             | X                       | Y         | Z         |               |               |             | X                       | Y         | Z         |
| 1             | 6             | 0           | 0.967751                | 4.254578  | 0.732377  | 35            | 6             | 0           | 1.322002                | -4.393616 | 2.817179  |
| 2             | 6             | 0           | 0.967751                | 4.254578  | -0.732377 | 36            | 6             | 0           | 1.866504                | -3.471144 | 3.696899  |
| 3             | 6             | 0           | 0.257956                | 3.125454  | -1.184007 | 37            | 6             | 0           | 1.897944                | -2.120776 | 3.352270  |
| 4             | 6             | 0           | -0.324729               | 2.423802  | 0.000000  | 38            | 6             | 0           | 1.362236                | -1.707531 | 2.141695  |
| 5             | 6             | 0           | 0.257956                | 3.125454  | 1.184007  | 39            | 6             | 0           | 1.362236                | -1.707531 | -2.141695 |
| 6             | 6             | 0           | 0.268533                | 2.824774  | 2.545459  | 40            | 6             | 0           | 1.897944                | -2.120776 | -3.352270 |
| 7             | 6             | 0           | 0.923900                | 3.678887  | 3.430607  | 41            | 6             | 0           | 1.866504                | -3.471144 | -3.696899 |
| 8             | 6             | 0           | 1.573195                | 4.825328  | 2.977041  | 42            | 6             | 0           | 1.322002                | -4.393616 | -2.817179 |
| 9             | 6             | 0           | 1.608804                | 5.112760  | 1.616065  | 43            | 1             | 0           | -0.209773               | 1.934307  | 2.929403  |
| 10            | 6             | 0           | 1.608804                | 5.112760  | -1.616065 | 44            | 1             | 0           | 0.929449                | 3.440394  | 4.489502  |
| 11            | 6             | 0           | 1.573195                | 4.825328  | -2.977041 | 45            | 1             | 0           | 2.070722                | 5.482106  | 3.683548  |
| 12            | 6             | 0           | 0.923900                | 3.678887  | -3.430607 | 46            | 1             | 0           | 2.146193                | 5.982549  | 1.250203  |
| 13            | 6             | 0           | 0.268533                | 2.824774  | -2.545459 | 47            | 1             | 0           | 2.146193                | 5.982549  | -1.250203 |
| 14            | 6             | 0           | -1.207504               | 1.399507  | 0.000000  | 48            | 1             | 0           | 2.070722                | 5.482106  | -3.683548 |
| 15            | 6             | 0           | -1.701297               | 0.688695  | -1.211285 | 49            | 1             | 0           | 0.929449                | 3.440394  | -4.489502 |
| 16            | 6             | 0           | -1.482586               | -0.698648 | -1.224740 | 50            | 1             | 0           | -0.209773               | 1.934307  | -2.929403 |
| 17            | 6             | 0           | -0.859870               | -1.275176 | -0.000000 | 51            | 1             | 0           | -1.760430               | -2.527322 | 2.315774  |
| 18            | 6             | 0           | -1.482586               | -0.698648 | 1.224740  | 52            | 1             | 0           | -2.981181               | -1.442135 | 4.177426  |
| 19            | 6             | 0           | -1.701297               | 0.688695  | 1.211285  | 53            | 1             | 0           | -3.440318               | 0.995776  | 4.108769  |
| 20            | 6             | 0           | -1.936250               | -1.456959 | 2.303272  | 54            | 1             | 0           | -2.613012               | 2.357412  | 2.205730  |
| 21            | 6             | 0           | -2.623978               | -0.844851 | 3.344786  | 55            | 1             | 0           | -2.613012               | 2.357412  | -2.205730 |
| 22            | 6             | 0           | -2.879283               | 0.524493  | 3.308258  | 56            | 1             | 0           | -3.440318               | 0.995776  | -4.108769 |
| 23            | 6             | 0           | -2.423167               | 1.289502  | 2.240597  | 57            | 1             | 0           | -2.981181               | -1.442135 | -4.177426 |
| 24            | 6             | 0           | -2.423167               | 1.289502  | -2.240597 | 58            | 1             | 0           | -1.760430               | -2.527322 | -2.315774 |
| 25            | 6             | 0           | -2.879283               | 0.524493  | -3.308258 | 59            | 1             | 0           | -0.051756               | -5.942426 | -1.163638 |
| 26            | 6             | 0           | -2.623978               | -0.844851 | -3.344786 | 60            | 1             | 0           | -0.051756               | -5.942426 | 1.163638  |
| 27            | 6             | 0           | -1.936250               | -1.456959 | -2.303272 | 61            | 1             | 0           | 1.306602                | -5.447717 | 3.080503  |
| 28            | 6             | 0           | 0.161739                | -2.150862 | -0.000000 | 62            | 1             | 0           | 2.270146                | -3.802549 | 4.648189  |
| 29            | 6             | 0           | 0.795777                | -2.628847 | -1.255661 | 63            | 1             | 0           | 2.325957                | -1.391130 | 4.031818  |
| 30            | 6             | 0           | 0.804224                | -3.998436 | -1.574389 | 64            | 1             | 0           | 1.354645                | -0.654730 | 1.876418  |
| 31            | 6             | 0           | 0.288378                | -5.033055 | -0.672148 | 65            | 1             | 0           | 1.354645                | -0.654730 | -1.876418 |
| 32            | 6             | 0           | 0.288378                | -5.033055 | 0.672148  | 66            | 1             | 0           | 2.325957                | -1.391130 | -4.031818 |
| 33            | 6             | 0           | 0.804224                | -3.998436 | 1.574389  | 67            | 1             | 0           | 2.270146                | -3.802549 | -4.648189 |
| 34            | 6             | 0           | 0.795777                | -2.628847 | 1.255661  | 68            | 1             | 0           | 1.306602                | -5.447717 | -3.080503 |

Zero-point correction= 0.549341 (Hartree/Particle)  
 Thermal correction to Energy= 0.578983  
 Thermal correction to Enthalpy= 0.579928  
 Thermal correction to Gibbs Free Energy= 0.488294  
 Sum of electronic and zero-point Energies= -1615.091363  
 Sum of electronic and thermal Energies= -1615.061720  
 Sum of electronic and thermal Enthalpies= -1615.060776  
 Sum of electronic and thermal Free Energies= -1615.152409

**Table S4.** Cartesian Coordinates of **1-F** (*endo* form) (C<sub>42</sub>H<sub>26</sub>, total 68 atoms) ( $\omega$ B97X-D/6-31G\*\*).

| Center Number | Atomic Number | Atomic Type | Coordinates (Angstroms) |           |           | Center Number | Atomic Number | Atomic Type | Coordinates (Angstroms) |           |           |
|---------------|---------------|-------------|-------------------------|-----------|-----------|---------------|---------------|-------------|-------------------------|-----------|-----------|
|               |               |             | X                       | Y         | Z         |               |               |             | X                       | Y         | Z         |
| 1             | 6             | 0           | -0.734255               | -3.458578 | 0.179364  | 35            | 1             | 0           | -2.305159               | 3.435788  | -1.294032 |
| 2             | 6             | 0           | 0.729121                | -3.459739 | 0.179362  | 36            | 1             | 0           | 2.310245                | 3.432551  | -1.293783 |
| 3             | 6             | 0           | 1.183194                | -2.344441 | -0.550001 | 37            | 1             | 0           | 4.158363                | 2.742085  | -2.789240 |
| 4             | 6             | 0           | -0.001090               | -1.618249 | -1.098286 | 38            | 1             | 0           | 4.089554                | 0.536029  | -3.916765 |
| 5             | 6             | 0           | -1.186577               | -2.342598 | -0.550070 | 39            | 1             | 0           | 2.194224                | -1.015705 | -3.489667 |
| 6             | 6             | 0           | -2.549962               | -2.050721 | -0.552398 | 40            | 1             | 0           | -4.490560               | -2.648745 | 0.130855  |
| 7             | 6             | 0           | -3.431442               | -2.886053 | 0.131250  | 41            | 1             | 0           | -3.678462               | -4.649139 | 1.341094  |
| 8             | 6             | 0           | -2.974832               | -4.009064 | 0.818227  | 42            | 1             | 0           | 3.671543                | -4.655076 | 1.340726  |
| 9             | 6             | 0           | -1.613881               | -4.297283 | 0.851518  | 43            | 1             | 0           | 4.486741                | -2.655861 | 0.130645  |
| 10            | 6             | 0           | 1.607483                | -4.299893 | 0.851369  | 44            | 6             | 0           | 0.001461                | 2.048167  | 0.606217  |
| 11            | 6             | 0           | 2.968888                | -4.013829 | 0.817980  | 45            | 6             | 0           | -1.251971               | 1.995903  | 1.402161  |
| 12            | 6             | 0           | 3.427244                | -2.891478 | 0.131088  | 46            | 6             | 0           | -2.120924               | 3.083243  | 1.488387  |
| 13            | 6             | 0           | 2.547029                | -2.054691 | -0.552400 | 47            | 1             | 0           | -1.839285               | 4.018979  | 1.015128  |
| 14            | 6             | 0           | -0.000195               | -0.481628 | -1.826505 | 48            | 1             | 0           | -4.006296               | 3.824231  | 2.203366  |
| 15            | 6             | 0           | -1.208788               | 0.330436  | -2.140041 | 49            | 6             | 0           | -3.335387               | 2.972682  | 2.153392  |
| 16            | 6             | 0           | -1.222343               | 1.598317  | -1.530666 | 50            | 6             | 0           | -3.694687               | 1.758865  | 2.734672  |
| 17            | 6             | 0           | 0.001462                | 1.900839  | -0.729748 | 51            | 1             | 0           | -4.650399               | 1.656427  | 3.238599  |
| 18            | 6             | 0           | 1.224890                | 1.596601  | -1.530530 | 52            | 6             | 0           | -2.824293               | 0.680503  | 2.675284  |
| 19            | 6             | 0           | 1.209606                | 0.328722  | -2.139885 | 53            | 1             | 0           | -3.098645               | -0.264006 | 3.136665  |
| 20            | 6             | 0           | -2.227912               | -0.039459 | -3.010245 | 54            | 6             | 0           | -1.577762               | 0.784438  | 2.042522  |
| 21            | 6             | 0           | -3.290590               | 0.830954  | -3.240612 | 55            | 6             | 0           | -0.672966               | -0.369162 | 2.083463  |
| 22            | 6             | 0           | -3.326036               | 2.070176  | -2.608869 | 56            | 6             | 0           | 1.254697                | 1.994283  | 1.402346  |
| 23            | 6             | 0           | -2.290011               | 2.458223  | -1.762053 | 57            | 6             | 0           | 2.125064                | 3.080488  | 1.488664  |
| 24            | 6             | 0           | 2.293776                | 2.455014  | -1.761821 | 58            | 1             | 0           | 1.844743                | 4.016558  | 1.015281  |
| 25            | 6             | 0           | 3.329323                | 2.065537  | -2.608562 | 59            | 6             | 0           | 3.339241                | 2.968357  | 2.153931  |
| 26            | 6             | 0           | 3.292192                | 0.826377  | -3.240311 | 60            | 1             | 0           | 4.011270                | 3.819016  | 2.204006  |
| 27            | 6             | 0           | 2.228279                | -0.042555 | -3.010019 | 61            | 6             | 0           | 3.696806                | 1.754086  | 2.735343  |
| 28            | 1             | 0           | -2.939407               | -1.174539 | -1.049672 | 62            | 1             | 0           | 4.652274                | 1.650419  | 3.239480  |
| 29            | 1             | 0           | -1.244660               | -5.151444 | 1.411313  | 63            | 6             | 0           | 2.825018                | 0.676848  | 2.675806  |
| 30            | 1             | 0           | 1.236980                | -5.153536 | 1.411109  | 64            | 1             | 0           | 3.098044                | -0.267996 | 3.137284  |
| 31            | 1             | 0           | 2.937737                | -1.179045 | -1.049642 | 65            | 6             | 0           | 1.578765                | 0.782401  | 2.042778  |
| 32            | 1             | 0           | -2.195197               | -1.012687 | -3.489827 | 66            | 6             | 0           | 0.672455                | -0.370025 | 2.083551  |
| 33            | 1             | 0           | -4.088316               | 0.541713  | -3.917112 | 67            | 1             | 0           | 1.162407                | -1.333744 | 2.205016  |
| 34            | 1             | 0           | -4.154116               | 2.747872  | -2.789636 | 68            | 1             | 0           | -1.164179               | -1.332244 | 2.204878  |

Zero-point correction= 0.549208 (Hartree/Particle)  
Thermal correction to Energy= 0.578779  
Thermal correction to Enthalpy= 0.579724  
Thermal correction to Gibbs Free Energy= 0.488994  
Sum of electronic and zero-point Energies= -1615.087734  
Sum of electronic and thermal Energies= -1615.058163  
Sum of electronic and thermal Enthalpies= -1615.057219  
Sum of electronic and thermal Free Energies= -1615.147948

**Table S5.** Cartesian Coordinates of  $\mathbf{I}^{2+}$  ( $\text{C}_{42}\text{H}_{26}$ , total 68 atoms) ( $\omega\text{B97X-D/6-31G}^{**}$ ).

| Center Number | Atomic Number | Atomic Type | Coordinates (Angstroms) |           |           | Center Number | Atomic Number | Atomic Type | Coordinates (Angstroms) |           |           |
|---------------|---------------|-------------|-------------------------|-----------|-----------|---------------|---------------|-------------|-------------------------|-----------|-----------|
|               |               |             | X                       | Y         | Z         |               |               |             | X                       | Y         | Z         |
| 1             | 6             | 0           | -5.153857               | -0.735127 | -0.097168 | 35            | 6             | 0           | 5.241350                | 2.726572  | -1.172743 |
| 2             | 6             | 0           | -5.153835               | 0.735215  | 0.097285  | 36            | 6             | 0           | 4.341124                | 3.674964  | -1.583666 |
| 3             | 6             | 0           | -3.799355               | 1.149412  | 0.182255  | 37            | 6             | 0           | 2.962561                | 3.414020  | -1.472662 |
| 4             | 6             | 0           | -2.951396               | 0.000010  | 0.000067  | 38            | 6             | 0           | 2.529241                | 2.223552  | -0.958256 |
| 5             | 6             | 0           | -3.799389               | -1.149373 | -0.182097 | 39            | 6             | 0           | 2.529249                | -2.223910 | 0.957462  |
| 6             | 6             | 0           | -3.463762               | -2.499124 | -0.308664 | 40            | 6             | 0           | 2.962571                | -3.414564 | 1.471435  |
| 7             | 6             | 0           | -4.496363               | -3.432354 | -0.384050 | 41            | 6             | 0           | 4.341136                | -3.675355 | 1.582783  |
| 8             | 6             | 0           | -5.822848               | -3.014618 | -0.316543 | 42            | 6             | 0           | 5.241359                | -2.726575 | 1.172752  |
| 9             | 6             | 0           | -6.169181               | -1.655570 | -0.162955 | 43            | 1             | 0           | -2.426062               | -2.812153 | -0.356006 |
| 10            | 6             | 0           | -6.169127               | 1.655693  | 0.163061  | 44            | 1             | 0           | -4.269173               | -4.486358 | -0.491019 |
| 11            | 6             | 0           | -5.822747               | 3.014727  | 0.316680  | 45            | 1             | 0           | -6.614452               | -3.754437 | -0.373576 |
| 12            | 6             | 0           | -4.496250               | 3.432414  | 0.384231  | 46            | 1             | 0           | -7.211290               | -1.364643 | -0.091123 |
| 13            | 6             | 0           | -3.463680               | 2.499147  | 0.308859  | 47            | 1             | 0           | -7.211245               | 1.364805  | 0.091205  |
| 14            | 6             | 0           | -1.497637               | 0.000002  | 0.000032  | 48            | 1             | 0           | -6.614327               | 3.754573  | 0.373708  |
| 15            | 6             | 0           | -0.795980               | -0.470323 | -1.143219 | 49            | 1             | 0           | -4.269024               | 4.486408  | 0.491220  |
| 16            | 6             | 0           | 0.638498                | -0.474595 | -1.131967 | 50            | 1             | 0           | -2.425969               | 2.812136  | 0.356228  |
| 17            | 6             | 0           | 1.321999                | -0.000012 | -0.000022 | 51            | 1             | 0           | 2.425807                | 0.957313  | 2.278004  |
| 18            | 6             | 0           | 0.638550                | 0.474587  | 1.131952  | 52            | 1             | 0           | 1.217214                | 1.692756  | 4.272483  |
| 19            | 6             | 0           | -0.795931               | 0.470329  | 1.143255  | 53            | 1             | 0           | -1.271124               | 1.580754  | 4.338773  |
| 20            | 6             | 0           | 1.341734                | 0.939706  | 2.288003  | 54            | 1             | 0           | -2.532175               | 0.796462  | 2.419342  |
| 21            | 6             | 0           | 0.671986                | 1.345223  | 3.402354  | 55            | 1             | 0           | -2.532255               | -0.796424 | -2.419270 |
| 22            | 6             | 0           | -0.746075               | 1.289381  | 3.435826  | 56            | 1             | 0           | -1.271255               | -1.580707 | -4.338743 |
| 23            | 6             | 0           | -1.453149               | 0.857517  | 2.351551  | 57            | 1             | 0           | 1.217082                | -1.692740 | -4.272515 |
| 24            | 6             | 0           | -1.453228               | -0.857493 | -2.351507 | 58            | 1             | 0           | 2.425730                | -0.957311 | -2.278045 |
| 25            | 6             | 0           | -0.746184               | -1.289353 | -3.435803 | 59            | 1             | 0           | 6.894209                | -1.043316 | 0.449154  |
| 26            | 6             | 0           | 0.671878                | -1.345210 | -3.402369 | 60            | 1             | 0           | 6.894206                | 1.044405  | -0.446617 |
| 27            | 6             | 0           | 1.341656                | -0.939707 | -2.288029 | 61            | 1             | 0           | 6.303806                | 2.926063  | -1.257878 |
| 28            | 6             | 0           | 2.833960                | -0.000011 | -0.000013 | 62            | 1             | 0           | 4.689497                | 4.617650  | -1.991006 |
| 29            | 6             | 0           | 3.425120                | -1.194979 | 0.513310  | 63            | 1             | 0           | 2.241763                | 4.156148  | -1.795963 |
| 30            | 6             | 0           | 4.834913                | -1.479395 | 0.635744  | 64            | 1             | 0           | 1.464448                | 2.059814  | -0.889544 |
| 31            | 6             | 0           | 5.908454                | -0.624401 | 0.268890  | 65            | 1             | 0           | 1.464454                | -2.060310 | 0.888435  |
| 32            | 6             | 0           | 5.908452                | 0.625101  | -0.267254 | 66            | 1             | 0           | 2.241776                | -4.156954 | 1.794141  |
| 33            | 6             | 0           | 4.834908                | 1.479577  | -0.635305 | 67            | 1             | 0           | 4.689511                | -4.618208 | 1.989732  |
| 34            | 6             | 0           | 3.425117                | 1.194929  | -0.513394 | 68            | 1             | 0           | 6.303816                | -2.925891 | 1.258283  |

Zero-point correction= 0.549893 (Hartree/Particle)  
 Thermal correction to Energy= 0.579931  
 Thermal correction to Enthalpy= 0.580876  
 Thermal correction to Gibbs Free Energy= 0.487973  
 Sum of electronic and zero-point Energies= -1614.544218  
 Sum of electronic and thermal Energies= -1614.514180  
 Sum of electronic and thermal Enthalpies= -1614.513236  
 Sum of electronic and thermal Free Energies= -1614.606138

**Table S6.** Cartesian Coordinates of 1-T (open-shell singlet, C<sub>42</sub>H<sub>26</sub>, total 68 atoms) (U $\omega$ B97X-D/6-31G\*\*).

| Center Number | Atomic Number | Atomic Type | Coordinates (Angstroms) |           |           | Center Number | Atomic Number | Atomic Type | Coordinates (Angstroms) |           |           |
|---------------|---------------|-------------|-------------------------|-----------|-----------|---------------|---------------|-------------|-------------------------|-----------|-----------|
|               |               |             | X                       | Y         | Z         |               |               |             | X                       | Y         | Z         |
| 1             | 6             | 0           | -5.174425               | -0.729908 | -0.075382 | 35            | 6             | 0           | 5.262664                | 2.792225  | -1.027431 |
| 2             | 6             | 0           | -5.174447               | 0.729888  | 0.075403  | 36            | 6             | 0           | 4.371181                | 3.784796  | -1.394678 |
| 3             | 6             | 0           | -3.819773               | 1.153252  | 0.125390  | 37            | 6             | 0           | 3.008515                | 3.516341  | -1.297941 |
| 4             | 6             | 0           | -2.963667               | 0.000022  | 0.000031  | 38            | 6             | 0           | 2.575388                | 2.285938  | -0.844490 |
| 5             | 6             | 0           | -3.819739               | -1.153237 | -0.125316 | 39            | 6             | 0           | 2.575267                | -2.286069 | 0.844108  |
| 6             | 6             | 0           | -3.507519               | -2.509508 | -0.253476 | 40            | 6             | 0           | 3.008332                | -3.516505 | 1.297530  |
| 7             | 6             | 0           | -4.547916               | -3.428767 | -0.339178 | 41            | 6             | 0           | 4.370985                | -3.784922 | 1.394560  |
| 8             | 6             | 0           | -5.880081               | -3.007940 | -0.292947 | 42            | 6             | 0           | 5.262518                | -2.792300 | 1.027573  |
| 9             | 6             | 0           | -6.201763               | -1.654198 | -0.158749 | 43            | 1             | 0           | -2.471680               | -2.832327 | -0.291767 |
| 10            | 6             | 0           | -6.201811               | 1.654152  | 0.158741  | 44            | 1             | 0           | -4.324173               | -4.485685 | -0.442128 |
| 11            | 6             | 0           | -5.880167               | 3.007900  | 0.292969  | 45            | 1             | 0           | -6.675849               | -3.742900 | -0.360547 |
| 12            | 6             | 0           | -4.548014               | 3.428760  | 0.339260  | 46            | 1             | 0           | -7.240380               | -1.339312 | -0.119591 |
| 13            | 6             | 0           | -3.507591               | 2.509529  | 0.253585  | 47            | 1             | 0           | -7.240418               | 1.339241  | 0.119547  |
| 14            | 6             | 0           | -1.493611               | 0.000039  | 0.000015  | 48            | 1             | 0           | -6.675956               | 3.742839  | 0.360548  |
| 15            | 6             | 0           | -0.785640               | -0.405594 | -1.151939 | 49            | 1             | 0           | -4.324302               | 4.485683  | 0.442232  |
| 16            | 6             | 0           | 0.648088                | -0.415667 | -1.143807 | 50            | 1             | 0           | -2.471761               | 2.832372  | 0.291920  |
| 17            | 6             | 0           | 1.351445                | 0.000029  | -0.000017 | 51            | 1             | 0           | 2.424026                | 0.856427  | 2.307829  |
| 18            | 6             | 0           | 0.648123                | 0.415747  | 1.143788  | 52            | 1             | 0           | 1.202418                | 1.530046  | 4.328260  |
| 19            | 6             | 0           | -0.785611               | 0.405683  | 1.151946  | 53            | 1             | 0           | -1.292607               | 1.450691  | 4.367900  |
| 20            | 6             | 0           | 1.339840                | 0.840708  | 2.323163  | 54            | 1             | 0           | -2.540039               | 0.740381  | 2.390252  |
| 21            | 6             | 0           | 0.660691                | 1.212019  | 3.443397  | 55            | 1             | 0           | -2.540083               | -0.740275 | -2.390229 |
| 22            | 6             | 0           | -0.760855               | 1.172180  | 3.463765  | 56            | 1             | 0           | -1.292680               | -1.450556 | -4.367900 |
| 23            | 6             | 0           | -1.457426               | 0.779013  | 2.360923  | 57            | 1             | 0           | 1.202344                | -1.529904 | -4.328310 |
| 24            | 6             | 0           | -1.457470               | -0.778907 | -2.360913 | 58            | 1             | 0           | 2.423982                | -0.856323 | -2.307857 |
| 25            | 6             | 0           | -0.760912               | -1.172057 | -3.463770 | 59            | 1             | 0           | 6.926867                | -1.062418 | 0.390627  |
| 26            | 6             | 0           | 0.660635                | -1.211899 | -3.443428 | 60            | 1             | 0           | 6.926925                | 1.062463  | -0.389917 |
| 27            | 6             | 0           | 1.339795                | -0.840610 | -2.323194 | 61            | 1             | 0           | 6.329181                | 2.986221  | -1.097683 |
| 28            | 6             | 0           | 2.854332                | 0.000006  | 0.000018  | 62            | 1             | 0           | 4.730088                | 4.745211  | -1.748558 |
| 29            | 6             | 0           | 3.457902                | -1.240056 | 0.457286  | 63            | 1             | 0           | 2.276620                | 4.267383  | -1.577035 |
| 30            | 6             | 0           | 4.853035                | -1.532758 | 0.563972  | 64            | 1             | 0           | 1.509099                | 2.119437  | -0.785473 |
| 31            | 6             | 0           | 5.942133                | -0.628728 | 0.231218  | 65            | 1             | 0           | 1.508985                | -2.119613 | 0.784840  |
| 32            | 6             | 0           | 5.942167                | 0.628731  | -0.230766 | 66            | 1             | 0           | 2.276399                | -4.267610 | 1.576355  |
| 33            | 6             | 0           | 4.853117                | 1.532704  | -0.563830 | 67            | 1             | 0           | 4.729844                | -4.745339 | 1.748484  |
| 34            | 6             | 0           | 3.457970                | 1.239992  | -0.457364 | 68            | 1             | 0           | 6.329025                | -2.986269 | 1.098045  |

Zero-point correction= 0.546304 (Hartree/Particle)  
Thermal correction to Energy= 0.576407  
Thermal correction to Enthalpy= 0.577351  
Thermal correction to Gibbs Free Energy= 0.483368  
Sum of electronic and zero-point Energies= -1615.059381  
Sum of electronic and thermal Energies= -1615.029278  
Sum of electronic and thermal Enthalpies= -1615.028334  
Sum of electronic and thermal Free Energies= -1615.122317

**Table S7.** Cartesian Coordinates of 1-T (triplet, C<sub>42</sub>H<sub>26</sub>, total 68 atoms) (U $\omega$ B97X-D/6-31G\*\*).

| Center Number | Atomic Number | Atomic Type | Coordinates (Angstroms) |           |           | Center Number | Atomic Number | Atomic Type | Coordinates (Angstroms) |           |           |
|---------------|---------------|-------------|-------------------------|-----------|-----------|---------------|---------------|-------------|-------------------------|-----------|-----------|
|               |               |             | X                       | Y         | Z         |               |               |             | X                       | Y         | Z         |
| 1             | 6             | 0           | -5.174372               | -0.730030 | -0.074242 | 35            | 6             | 0           | 5.262586                | 2.795588  | -1.018202 |
| 2             | 6             | 0           | -5.174377               | 0.730036  | 0.074342  | 36            | 6             | 0           | 4.371115                | 3.789378  | -1.382187 |
| 3             | 6             | 0           | -3.819611               | 1.153417  | 0.123280  | 37            | 6             | 0           | 3.008455                | 3.520550  | -1.286472 |
| 4             | 6             | 0           | -2.963737               | 0.000018  | -0.000024 | 38            | 6             | 0           | 2.575305                | 2.288636  | -0.837156 |
| 5             | 6             | 0           | -3.819603               | -1.153391 | -0.123282 | 39            | 6             | 0           | 2.575215                | -2.288696 | 0.837003  |
| 6             | 6             | 0           | -3.507127               | -2.509715 | -0.250149 | 40            | 6             | 0           | 3.008319                | -3.520566 | 1.286487  |
| 7             | 6             | 0           | -4.547422               | -3.429181 | -0.334974 | 41            | 6             | 0           | 4.370969                | -3.789358 | 1.382441  |
| 8             | 6             | 0           | -5.879633               | -3.008420 | -0.289342 | 42            | 6             | 0           | 5.262476                | -2.795603 | 1.018452  |
| 9             | 6             | 0           | -6.201549               | -1.654534 | -0.156779 | 43            | 1             | 0           | -2.471204               | -2.832328 | -0.288066 |
| 10            | 6             | 0           | -6.201561               | 1.654525  | 0.156947  | 44            | 1             | 0           | -4.323599               | -4.486189 | -0.436816 |
| 11            | 6             | 0           | -5.879656               | 3.008417  | 0.289475  | 45            | 1             | 0           | -6.675305               | -3.743546 | -0.356264 |
| 12            | 6             | 0           | -4.547448               | 3.429198  | 0.335006  | 46            | 1             | 0           | -7.240229               | -1.339764 | -0.118359 |
| 13            | 6             | 0           | -3.507145               | 2.509748  | 0.250112  | 47            | 1             | 0           | -7.240240               | 1.339741  | 0.118603  |
| 14            | 6             | 0           | -1.493379               | 0.000020  | -0.000035 | 48            | 1             | 0           | -6.675334               | 3.743531  | 0.356449  |
| 15            | 6             | 0           | -0.785688               | -0.402474 | -1.152948 | 49            | 1             | 0           | -4.323633               | 4.486210  | 0.436824  |
| 16            | 6             | 0           | 0.648081                | -0.412405 | -1.144965 | 50            | 1             | 0           | -2.471225               | 2.832375  | 0.287958  |
| 17            | 6             | 0           | 1.351314                | 0.000001  | -0.000070 | 51            | 1             | 0           | 2.423884                | 0.849611  | 2.310476  |
| 18            | 6             | 0           | 0.648118                | 0.412428  | 1.144847  | 52            | 1             | 0           | 1.201917                | 1.518667  | 4.332201  |
| 19            | 6             | 0           | -0.785656               | 0.402512  | 1.152860  | 53            | 1             | 0           | -1.293133               | 1.440945  | 4.370843  |
| 20            | 6             | 0           | 1.339684                | 0.834203  | 2.325511  | 54            | 1             | 0           | -2.540470               | 0.735987  | 2.390963  |
| 21            | 6             | 0           | 0.660332                | 1.202994  | 3.446409  | 55            | 1             | 0           | -2.540522               | -0.735946 | -2.391025 |
| 22            | 6             | 0           | -0.761327               | 1.163970  | 3.466268  | 56            | 1             | 0           | -1.293221               | -1.440886 | -4.370927 |
| 23            | 6             | 0           | -1.457780               | 0.773752  | 2.362374  | 57            | 1             | 0           | 1.201829                | -1.518603 | -4.332344 |
| 24            | 6             | 0           | -1.457831               | -0.773706 | -2.362454 | 58            | 1             | 0           | 2.423833                | -0.849578 | -2.310608 |
| 25            | 6             | 0           | -0.761396               | -1.163915 | -3.466362 | 59            | 1             | 0           | 6.926800                | -1.063821 | 0.386735  |
| 26            | 6             | 0           | 0.660264                | -1.202945 | -3.446533 | 60            | 1             | 0           | 6.926843                | 1.063643  | -0.386745 |
| 27            | 6             | 0           | 1.339633                | -0.834172 | -2.325640 | 61            | 1             | 0           | 6.329103                | 2.989826  | -1.087768 |
| 28            | 6             | 0           | 2.854292                | -0.000028 | -0.000066 | 62            | 1             | 0           | 4.730032                | 4.750969  | -1.732850 |
| 29            | 6             | 0           | 3.457811                | -1.241480 | 0.453282  | 63            | 1             | 0           | 2.276562                | 4.272487  | -1.563154 |
| 30            | 6             | 0           | 4.852973                | -1.534598 | 0.558899  | 64            | 1             | 0           | 1.509008                | 2.121977  | -0.778886 |
| 31            | 6             | 0           | 5.942063                | -0.629556 | 0.228913  | 65            | 1             | 0           | 1.508924                | -2.122076 | 0.778523  |
| 32            | 6             | 0           | 5.942089                | 0.629431  | -0.228890 | 66            | 1             | 0           | 2.276397                | -4.272503 | 1.563092  |
| 33            | 6             | 0           | 4.853034                | 1.534533  | -0.558829 | 67            | 1             | 0           | 4.729850                | -4.750895 | 1.733287  |
| 34            | 6             | 0           | 3.457862                | 1.241416  | -0.453358 | 68            | 1             | 0           | 6.328987                | -2.989832 | 1.088152  |

Zero-point correction= 0.546349 (Hartree/Particle)  
 Thermal correction to Energy= 0.576447  
 Thermal correction to Enthalpy= 0.577391  
 Thermal correction to Gibbs Free Energy= 0.482423  
 Sum of electronic and zero-point Energies= -1615.059285  
 Sum of electronic and thermal Energies= -1615.029187  
 Sum of electronic and thermal Enthalpies= -1615.028243  
 Sum of electronic and thermal Free Energies= -1615.123212
